1    **Title:** Rapid, Reference-Free Human Genotype Imputation with Denoising Autoencoders

2    **Authors:** Raquel Dias<sup>1,2</sup>, Doug Evans<sup>1,2</sup>, Shang-Fu Chen<sup>1,2</sup>, Kai-Yu Chen<sup>1,2</sup>, Leslie

3    Chan<sup>1,2</sup>, Ali Torkamani<sup>1,2,\*</sup>

4

5    <sup>1</sup> Scripps Research Translational Institute, Scripps Research, La Jolla, CA, 92037, USA

6    <sup>2</sup> Department of Integrative Structural and Computational Biology, Scripps Research, La

7    Jolla, CA, 92037, USA

8

9    **\* Corresponding author:**

10    Ali Torkamani, Ph.D.

11    3344 North Torrey Pines Court, Suite 300

12    La Jolla, CA 92037

13    Phone: 858-784-2082

14    [atorkama@scripps.edu](mailto:atorkama@scripps.edu)

15

# **Abstract**

Genotype imputation is a foundational tool for population genetics. Standard statistical imputation approaches rely on the co-location of large whole-genome sequencing-based reference panels, powerful computing environments, and potentially sensitive genetic study data. This results in computational resource and privacy-risk barriers to access to cutting-edge imputation techniques. Moreover, the accuracy of current statistical approaches is known to degrade in regions of low and complex linkage disequilibrium.

Artificial neural network-based imputation approaches may overcome these limitations by encoding complex genotype relationships in easily portable inference models. Here we demonstrate an autoencoder-based approach for genotype imputation, using a large, commonly-used reference panel, and spanning the entirety of human chromosome 22. Our autoencoder-based genotype imputation strategy achieved superior imputation accuracy across the allele-frequency spectrum and across genomes of diverse ancestry, while delivering at least 4-fold faster inference run time relative to standard imputation tools.

# 1 Introduction

2 The human genome is inherited in large blocks from parental genomes, generated through a  
3 DNA-sequence-dependent shuffling process called recombination. The non-random nature of  
4 recombination breakpoints producing these genomic blocks results in correlative genotype  
5 relationships across genetic variants, known as linkage disequilibrium. Thus, genotypes for a  
6 small subset (1% – 10%) of observed common genetic variants can be used to infer the genotype  
7 status of unobserved but known genetic variation sites across the genome (on the order of ~1M  
8 of >10M sites) (Li et al., 2009; Marchini and Howie, 2010). This process, called genotype  
9 imputation, allows for the generation of nearly the full complement of known common genetic  
10 variation at a fraction of the cost of direct genotyping or sequencing. Given the massive scale of  
11 genotyping required for genome-wide association studies or implementation of genetically-  
12 informed population health initiatives, genotype imputation is an essential approach in population  
13 genetics.

14 Standard approaches to genotype imputation utilize Hidden Markov Models (HMM) (Browning et  
15 al., 2018; Das et al., 2016a; Rubinacci et al., 2020) distributed alongside large WGS-based  
16 reference panels (Browning and Browning, 2016). In general terms, these imputation algorithms  
17 use genetic variants shared between to-be-imputed genomes and the reference panel and apply  
18 Hidden Markov Models (HMM) to impute the missing genotypes per sample (Das et al., 2018).  
19 Genotyped variants are the observed states of the HMM, whereas the to-be-imputed genetic  
20 variants present in the reference panel are the hidden states. The HMM parameter function  
21 depends on recombination rates, mutation rates, and/or genotype error rates that must be fit by  
22 Markov Chain Monte Carlo Algorithm (MCMC) or an expectation-maximization algorithm. Thus,  
23 HMM-based imputation is a computationally intensive process, requiring access to both high-  
24 performance computing environments and large, privacy-sensitive, WGS reference panels  
25 (Kowalski et al., 2019). Often, investigators outside of large consortia will resort to submitting  
26 genotype data to imputation servers (Das et al., 2016a), resulting in privacy and scalability  
27 concerns (Sarkar et al., 2021).

Recently, artificial neural networks, especially autoencoders, have attracted attention in functional genomics for their ability to fill-in missing data from genomic assays with significant dropout events, like single-cell RNAseq and ChIP-seq (Arisdakessian et al., 2019; Koh et al., 2017; Lal et al., 2021). Autoencoders are neural networks tasked with the problem of simply reconstructing the original input data, with constraints applied to the network architecture or transformations applied to the input data in order to achieve a desired goal like dimensionality reduction or compression, and de-noising or de-masking (Abouzid et al., 2019; Liu et al., 2020; Voulodimos et al., 2018), stochastic noise or masking is used to modify or remove data inputs, training the autoencoder to reconstruct the original uncorrupted data from corrupted inputs (Tian et al., 2020). These autoencoder characteristics are well-suited for genotype imputation and may address some of the limitations of HMM-based imputation by eliminating the need for dissemination of reference panels and allowing the capture of non-linear relationships in genomic regions with complex linkage disequilibrium structures. Some attempts at genotype imputation using neural networks have been previously reported, though for specific genomic contexts (Naito et al., 2021) at genotype masking levels (5% – 20%) not applicable in typical real-world population genetics scenarios (Chen and Shi, 2019; Islam et al., 2021; Kojima et al., 2020; Sun and Kardia, 2008). Here we present a generalized approach to unphased human genotype imputation using sparse, denoising autoencoders capable of highly accurate genotype imputation at genotype masking levels (98+%) appropriate for array-based genotyping and low-pass sequencing-based population genetics initiatives. We describe the initial training and implementation of autoencoders spanning all of human chromosome 22, achieving equivalent to superior accuracy relative to modern HMM-based methods, and dramatically improving computational efficiency at deployment without the need to distribute reference panels.

# 1 Materials and Methods

## 2 Overview

3 Sparse, de-noising autoencoders spanning all bi-allelic SNPs observed in the Haplotype  
4 Reference Consortium were developed and optimized. Each bi-allelic SNP was encoded as two  
5 binary input nodes, representing the presence or absence of each allele (**Figure 1A, 1D**). This  
6 encoding allows for the straightforward extension to multi-allelic architectures and non-binary  
7 allele presence probabilities. A data augmentation approach using modeled recombination events  
8 and offspring formation coupled with random masking at an escalating rate drove our  
9 autoencoder training strategy (**Figure 1B**). Because of the extreme skew of the allele frequency  
10 distribution for rarely present alleles (Auton et al., 2015), a focal-loss-based approach was  
11 essential to genotype imputation performance. The basic architecture of the template fully-  
12 connected autoencoder before optimization to each genomic segment is depicted in **Figure 1C**.  
13 Individual autoencoders were designed to span genomic segments with boundaries defined by  
14 computationally identified recombination hotspots (**Figure 1E**). The starting point for model  
15 hyperparameters were randomly selected from a grid of possible combinations and were further  
16 tuned from a battery of features describing the complexity of the linkage-disequilibrium structure  
17 of each genomic segment.

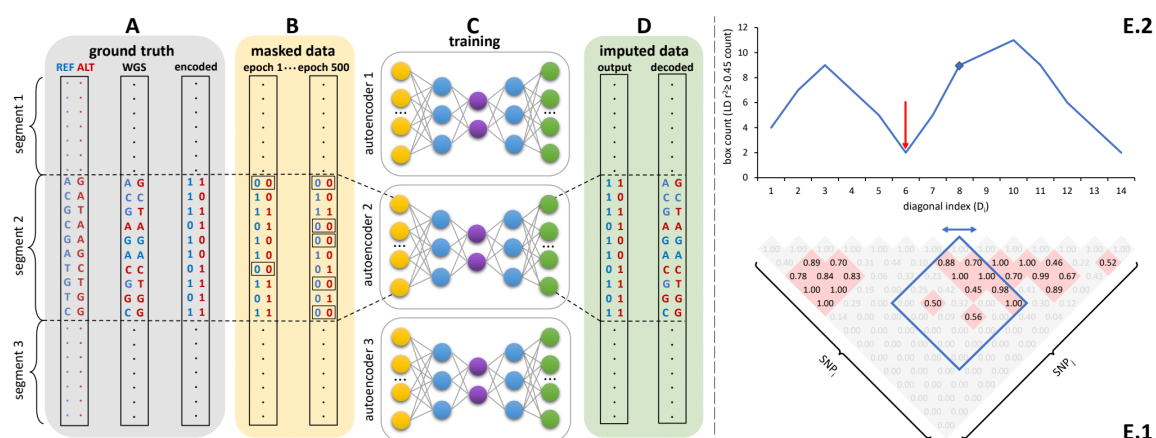

19 **Figure 1. Schematic overview of the autoencoder training workflow. A)** Ground truth whole  
20 genome sequencing data is encoded as binary values representing the presence (1) or absence

(0) of the reference allele (blue) and alternative allele (red). **B)** Variant masking (setting both alleles as absent, represented by 0) corrupts data inputs at a gradually increasing masking rate. Example masked variants are outlined. **C)** Fully-connected autoencoders spanning segments defined as shown in panel **E**, are then trained to reconstruct the original uncorrupted data from corrupted inputs; **D)** the reconstructed outputs (imputed data) are compared to the ground truth states for loss calculation and are decoded back to genotypes. **E)** Tiling of autoencoders across the genome is achieved by **E.1)** calculating a  $n \times n$  matrix of pairwise SNP correlations, thresholding them at 0.45 (selected values are shown in red background, excluded values in gray), **E.2)** quantifying the overall local LD strength centered at each SNP by computing their local correlation box counts and splitting the genome into approximately independent segments by identifying local minima (recombination hotspots). The red arrow illustrates minima between strong LD regions.

### **Genotype Encoding**

Genotypes for all bi-allelic SNPs were converted to binary values representing the presence (1) or absence (0) of the reference allele A and alternative allele B, respectively, as shown in

**Equation 1.**

$$x_i = \begin{cases} \text{if}(G_i = [A, A]): & x_i = [1, 0] \\ \text{if}(G_i = [A, B]): & x_i = [1, 1] \\ \text{if}(G_i = [B, A]): & x_i = [1, 1] \\ \text{if}(G_i = [B, B]): & x_i = [0, 1] \\ \text{if}(G_i = [null]): & x_i = [0, 0] \end{cases} \quad (1)$$

Where  $x$  is a vector containing the two allele presence input nodes to the autoencoder and their encoded allele presence values derived from the original genotype,  $G$ , of variant  $i$ . The output nodes of the autoencoder, regardless of activation function, are similarly rescaled to 0 - 1. The scaled outputs can also be regarded as probabilities and can be combined for the calculation of alternative allele dosage and/or genotype probabilities. This representation maintains the

interdependencies among classes, is extensible to other classes of genetic variation, and allows for the use of probabilistic loss functions.

### **Training Data, Masking, and Data Augmentation**

*Training Data.* Whole-genome sequence data from the Haplotype Reference Consortium (HRC) was used for training and as the reference panel for comparison to HMM-based imputation (McCarthy et al., 2016). The dataset consists of 27,165 samples and 39,235,157 biallelic SNPs generated using whole-genome sequence data from 20 studies of predominantly European ancestry (HRC Release 1.1): 83.92% European, 2.33% East Asian, 1.63% Native American, 2.17% South Asian, 2.96% African, and 6.99% admixed ancestry individuals. Genetic ancestry was determined using continental population classification from the 1000 Genomes Phase3 v5 (1000G) reference panel and a 95% cutoff using Admixture software (Alexander et al., 2009). Genotype imputation autoencoders were trained for all 510,442 unique SNPs observed in HRC on human chromosome 22.

*Validation and Testing Data.* A balanced (50%:50% European and African genetic ancestry) subset of 796 whole genome sequences from the Atherosclerosis Risk in Communities cohort (ARIC) (Mou et al., 2018), was used for model validation and selection. The Welllderly (Erikson et al., 2016), Human Genome Diversity Panel (HGDP) (Cann, 2002), and Multi-Ethnic Study of Atherosclerosis (MESA) (Bild, 2002) cohorts were used for model testing. The Welllderly cohort consisted of 961 whole genomes of predominantly European genetic ancestry. HGDP consisted of 929 individuals across multiple ancestries: 11.84% European, 14.64% East Asian, 6.57% Native American, 10.98% African, and 55.97% admixed. MESA consisted of 5,370 whole genomes across multiple ancestries: 27.62% European, 11.25% East Asian, 4.99% Native American, 5.53% African, and 50.61% admixed.

GRCh38 mapped cohorts (HGDP and MESA) were converted to hg19 using Picard v2.25 ("Picard toolkit," 2019). All other datasets were originally mapped and called against hg19. Multi-allelic SNPs, SNPs with >10% missingness, and SNPs not observed in HRC were removed with

1 bcftools v1.10.2 (Danecek et al., 2021). Mock genotype array data was generated from these  
 2 WGS cohorts by restricting genotypes to those present on commonly used genotyping arrays  
 3 (Affymetrix 6.0, UKB Axiom, and Omni 1.5M). For chromosome 22, intersection with HRC and  
 4 this array-like masking respectively resulted in: 9,025, 10,615, and 14,453 out of 306,812 SNPs  
 5 observed in ARIC; 8,630, 10,325, and 12,969 out of 195,148 SNPs observed in the Welllderly;  
 6 10,176, 11,086, and 14,693 out of 341,819 SNPs observed in HGDP; 9,237, 10,428, and 13,677  
 7 out of 445,839 SNPs observed in MESA.

8 *Data Augmentation.* We employed two strategies for data augmentation – random variant  
 9 masking and simulating further recombination with offspring formation. During training, random  
 10 masking of input genotypes was performed at escalating rates, starting with a relatively low  
 11 masking rate (80% of variants) that is gradually incremented in subsequent training rounds until  
 12 up to only 5 variants remain unmasked per autoencoder. Masked variants are encoded as the  
 13 *null* case in **Equation 1**. During finetuning we used sim1000G (Dimitromanolakis et al., 2019) to  
 14 simulate of offspring formation using the default genetic map and HRC genomes as parents. A  
 15 total of 30,000 offspring genomes were generated and merged with the original HRC dataset, for  
 16 a total of 57,165 genomes.

## 17 **Loss Function**

18 In order to account for the overwhelming abundance of rare variants, the accuracy of allele  
 19 presence reconstruction was scored using an adapted version of focal loss (*FL*) [32], shown in  
 20 **Equation 2**.

$$21 \quad FL = -\alpha_t(1 - p_t)^\gamma [x_t \log(p_t) + (1 - x_t) \log(1 - p_t)] \quad (2)$$

22 Where the classic cross entropy (shown as binary log loss in brackets) of the truth class ( $x_t$ )  
 23 predicted probability ( $p_t$ ) is weighted by the class imbalance factor  $\alpha_t$  and a modulating factor  $(1 -$   
 24  $p_t)^\gamma$ . The modulating factor is the standard focal loss factor with hyperparameter,  $\gamma$ , which  
 25 amplifies the focal loss effect by down-weighting the contributions of well-classified alleles to the



1 overall loss (especially abundant reference alleles for rare variant sites).  $\alpha_t$  is an additional  
2 balancing hyperparameter set to the truth class frequency.  
3 This base focal loss function is further penalized and regularized to encourage simple and sparse  
4 models in terms of edge-weight and hidden layer activation complexity. These additional  
5 penalties result in our final loss function as shown in **Equation 3**.

$$6 \quad SFL = -\alpha_t(1 - p_t)^y [x_t \log(p_t) + (1 - x_t) \log(1 - p_t)] + \beta S_{(\rho||\hat{\rho})} + \lambda_1 L1 + \lambda_2 L2 \quad (3)$$

7 Where  $L1$  and  $L2$  are the standard  $L1$  and  $L2$  norms of the autoencoder weight matrix, with their  
8 contributions mediated by the hyperparameters  $\lambda_1$  and  $\lambda_2$ .  $S$  is a sparsity penalty, with its  
9 contribution mediated by the hyperparameter  $\beta$ , which penalizes deviation from a target hidden  
10 node activation set by the hyperparameter  $(\rho)$  vs the observed mean activation  $\hat{\rho}$  over a training  
11 batch  $j$  summed over total batches  $n$ , as shown in Equation 4:

$$12 \quad S_{(\rho||\hat{\rho})} = \sum_{j=1}^n \rho * \log\left(\frac{\rho}{\hat{\rho}_j}\right) + (1 - \rho) * \log\left(\frac{1-\rho}{1-\hat{\rho}_j}\right) \quad (4)$$

### 13 **Genome Tiling**

14 All model training tasks were distributed across a diversified set of NVIDIA graphical processing  
15 units (GPUs) with different video memory limits: 5x Titan Vs (12GB), 8x A100s (40GB), 60x  
16 V100s (32GB). Given computational complexity and GPU memory limitations, individual  
17 autoencoders were designed to span approximately independent genomic segments with  
18 boundaries defined by computationally identified recombination hotspots (**Figure 1E**). These  
19 segments were defined using an adaptation of the LDetect algorithm [33]. First, we calculated a  $n$   
20  $\times n$  matrix of pairwise SNP correlations using all common genetic variation ( $\geq 5\%$  minor allele  
21 frequency) from HRC. Correlation values were thresholded at 0.45. For each SNP, we calculated  
22 a box count of all pairwise SNP correlations spanning 500 common SNPs upstream and  
23 downstream of the index SNP. This moving box count quantifies the overall local LD strength  
24 centered at each SNP. Local minima in this moving box count were used to split the genome into  
25 approximately independent genomic segments of two types – large segments of high LD

interlaced with short segments of weak LD corresponding to recombination hotspot regions. Individual autoencoders were designed to span the entirety of a single high LD segment plus its adjacent upstream and downstream weak LD regions. Thus, adjacent autoencoders overlap at their weak LD ends. If an independent genomic segment exceeded the threshold number of SNPs amenable to deep learning given GPU memory limitations, internal local minima within the high LD regions were used to split the genomic segments further to a maximum of 6000 SNPs per autoencoder. Any remaining genomic segments still exceeding 6000 SNPs were further split into 6000 SNP segments with large overlaps of 2500 SNPs given the high degree of informative LD split across these regions. This tiling process resulted in 256 genomic segments: 188 independent LD segments, 32 high LD segments resulting from internal local minima splits, and 36 segments further split due to GPU memory limitations.

### **Hyperparameter Initialization and Grid Search**

We first used a random grid search approach to define initial hyperparameter combinations producing generally accurate genotype imputation results. The hyperparameters and their potential starting values are listed in **Table 1**. This coarse-grain grid search was performed on all genomic segments of chromosome 22 (256 genomic segments), each tested with 100 randomly selected hyperparameter combinations per genomic segment, with a batch size of 256 samples, training for 500 epochs without any stop criteria, and validating on an independent dataset (ARIC). To evaluate the performance of each hyperparameter combination, we calculated the average coefficient of determination (r-squared) comparing the predicted and observed alternative allele dosages per variant. Concordance and F1-score were also calculated to screen for anomalies but were not ultimately used for model selection.

1 **Table1.** Description and values of hyperparameters tested in grid search.

| Hyperparameter description                        | Tested values (coarse-grid search)                          |
|---------------------------------------------------|-------------------------------------------------------------|
| $\lambda_1$ for L1 regularization                 | [1e-3, 1e-4, 1e-5, 1e-6, 1e-1, 1e-2, 1e-7, 1e-8]            |
| $\lambda_2$ for L2 regularization                 | [1e-3, 1e-4, 1e-5, 1e-6, 1e-1, 1e-2, 1e-7, 1e-8]            |
| Sparsity scaling factor ( $\beta$ )               | [0, 0.001, 0.01, 0.05, 1, 5, 10]                            |
| Target average hidden layer activation ( $\rho$ ) | [0.001, 0.004, 0.007, 0.01, 0.04, 0.07, 0.1, 0.4, 0.7, 1.0] |
| Activation function type                          | ['sigmoid', 'tanh', 'relu', 'softplus']                     |
| Learning rate                                     | [0.000001, 0.00001, 0.0001, 0.001, 0.01, 0.1, 1, 10, 100]   |
| Amplifying factor for focal loss ( $\gamma$ )     | [0, 0.5, 1, 2, 3, 5]                                        |
| Optimizer type                                    | ["Adam", "RMS Propagation", "Gradient Descent"]             |
| Loss type                                         | ["Binary Cross Entropy", "Custom Focal Loss"]               |
| Number of hidden layers                           | [1, 2, 4, 6, 8]                                             |
| Hidden layer size ratio                           | [0.2, 0.3, 0.4, 0.5, 0.6, 0.7, 0.8, 0.9, 1]                 |
| Learning rate decay ratio                         | [0.0, 0.25, 0.5, 0.75, 0.95, 0.99, 0.999, 0.9999]           |

2 **Table 1.**  $\lambda_1$ : scaling factor for Least Absolute Shrinkage and Selection Operator (LASSO or L1)  
3 regularization;  $\lambda_2$ : scaling factor for Ridge (L2) regularization;  $\beta$ : scaling factor for sparsity penalty  
4 described in equation (4);  $\rho$ : target hidden layer activation described in equation (4); Activation  
5 function type: defines how the output of a hidden neuron will be computed given a set of inputs;  
6 Learning rate: step size at each learning iteration while moving toward the minimum of the loss  
7 function;  $\gamma$ : amplifying factor for focal loss described in equation (3); Optimizer type: algorithms  
8 utilized to minimize the loss function and update the model weights in backpropagation [34]; Loss  
9 type: algorithms utilized to calculate the model error (equation (2)); Number of hidden layers: how  
10 many layers of artificial neurons to be implemented between input layer and output layer; Hidden  
11 layer size ratio: scaling factor to resize the next hidden layer with reference to the size of its previous  
12 layer; Learning rate decay ratio: scaling factor for updating the learning rate value on every 500  
13 epochs.

1

## 2 **Hyperparameter Tuning**

3 In order to avoid local optimal solutions and reduce the hyperparameter search space, we  
 4 developed an ensemble-based machine learning approach (Extreme Gradient Boosting -  
 5 XGBoost) to predict the expected performance (r-squared) of each hyperparameter combination  
 6 per genomic segment using the results of the coarse-grid search and predictive features  
 7 calculated for each genomic segment. These features include the number of variants, average  
 8 recombination rate and average pairwise Pearson correlation across all SNPs, proportion of rare  
 9 and common variants across multiple minor allele frequency (MAF) bins, number of principal  
 10 components necessary to explain at least 90% of variance, and the total variance explained by  
 11 the first 2 principal components. The observed accuracies of the coarse-grid search, numbering  
 12 25,600 training inputs, were used to predict the accuracy of 500,000 new hyperparameter  
 13 combinations selected from **Table 1** without training. All categorical predictors (activation function  
 14 name, optimizer type, loss function type) were one-hot encoded. The model was implemented  
 15 using XGBoost package v1.4.1 in Python v3.8.3 with 10-fold cross-validation and default settings.  
 16 We then ranked all hyperparameter combinations by their predicted performance and selected  
 17 the top 10 candidates per genomic segment along with the single best initially tested  
 18 hyperparameter combination per genomic segments for further consideration. All other  
 19 hyperparameter combinations were discarded. Genomic segments with sub-optimal performance  
 20 relative to Minimac were subjected to tuning with simulated offspring formation. For tuning, the  
 21 maximum number of epochs was increased (35,000) with automatic stop criteria: if there is no  
 22 improvement in average loss value of the current masking/training cycle versus the previous one,  
 23 the training is interrupted, otherwise training continues until the maximum epoch limit is reached.  
 24 Each masking/training cycle consisted of 500 epochs. Final hyperparameter selection was based  
 25 on performance on the validation dataset (ARIC).

## 26 **Performance Testing and Comparisons**

Performance was compared to Minimac4 (Das et al., 2016b), Beagle5 (Browning et al., 2018), and Impute5 (Rubinacci et al., 2020) using default parameters. Population level reconstruction accuracy is quantified by measuring r-squared across multiple strata of data: per genomic segment, at whole chromosome level, and stratified across multiple minor allele frequency bins: [0.001-0.005), [0.005-0.01), [0.01-0.05), [0.05-0.1), [0.1-0.2), [0.2-0.3), [0.3-0.4), [0.4-0.5). While r-squared is our primary comparison metric, sample-level and population-level model performance is also evaluated with concordance and the F1-score. Wilcoxon rank-sum testing was used to assess the significance of accuracy differences observed. Spearman correlations were used to evaluate the relationships between genomic segment features and observed imputation accuracy differences. Standard errors for per variant imputation accuracy r-squared is equal or less than 0.001 where not specified. Performance is reported only for the independent test datasets (Welllderly, MESA, and HGDP).

We used the MESA cohort for inference runtime comparisons. Runtime was determined using the average and standard error of three imputation replicates. Two hardware configurations were used for the tests: 1) a low-end environment: 16-core Intel Xeon CPU (E5-2640 v2 2.00GHz), 250GB RAM, and one GPU (NVIDIA GTX 1080); 2) a high-end environment: 24-Core AMD CPU (EPYC 7352 2.3GHz), 250GB RAM, using one NVIDIA A100 GPU. We report computation time only, input/output (I/O) reading/writing times are excluded as separately optimized functions.

### **Data availability**

The data that support the findings of this study are available from dbGAP and European Genome-phenome Archive (EGA), but restrictions apply to the availability of these data, which were used under ethics approval for the current study, and so are not openly available to the public. The computational pipeline for autoencoder training and validation is available at [https://github.com/TorkamaniLab/Imputation\\_Autoencoder/tree/master/autoencoder\\_tuning\\_pipeline](https://github.com/TorkamaniLab/Imputation_Autoencoder/tree/master/autoencoder_tuning_pipeline). The python script for calculating imputation accuracy is available at [https://github.com/TorkamaniLab/imputation\\_accuracy\\_calculator](https://github.com/TorkamaniLab/imputation_accuracy_calculator).

# 1 Results

## 2 Untuned Performance and Model Optimization.

3 A preliminary comparison of the best performing autoencoder per genomic segment vs HMM-  
 4 based imputation was made after the initial grid (Minimac4: **Figure 2**, Beagle5 and Eagle5:  
 5 **Supplemental Figures S1-S2**). Untuned autoencoder performance was equivalent or inferior to  
 6 all tested HMM-based methods except when tested on the European ancestry-rich Welllderly  
 7 dataset when masked using the Affymetrix 6.0 and UKB Axiom marker sets, but not Omni 1.5M  
 8 markers. HMM-based imputation was consistently superior across the more ancestrally diverse  
 9 test datasets (MESA and HGDP) (two proportion test,  $p \leq 8.77 \times 10^{-6}$ ). Overall, when performance  
 10 across genomic segments, test datasets, and test array marker sets was combined, the  
 11 autoencoders exhibited an average r-squared per variant of  $0.352 \pm 0.008$  in reconstruction of  
 12 WGS ground truth genotypes versus an average r-squared per variant of  $0.374 \pm 0.007$ ,  
 13  $0.364 \pm 0.007$ , and  $0.357 \pm 0.007$  for HMM-based imputation methods (Minimac4, Beagle5, and  
 14 Impute5, respectively) (**Table 2**). This difference was statistically significant only relative to  
 15 Minimac4 (Minimac4: Wilcoxon rank-sum test  $p=0.037$ , Beagle5 and Eagle5:  $p \geq 0.66$ ).

16 In order to understand the relationship between genomic segment features, hyperparameter  
 17 values, and imputation performance, we calculated predictive features (see **Methods**) for each  
 18 genomic segment and determined their Spearman correlation with the differences in r-squared  
 19 observed for the autoencoder vs Minimac4 (**Supplemental Figure S3**). We observed that the  
 20 autoencoder had superior performance when applied to the genomic segments with the most  
 21 complex LD structures: those with larger numbers of observed unique haplotypes, unique  
 22 diplotypes, and heterozygosity, as well as high average MAF, and low average pairwise Pearson  
 23 correlation across all SNPs (average LD) (Spearman correlation ( $\rho \geq 0.22$ ,  $p \leq 9.8 \times 10^{-04}$ )).  
 24 Similarly, we quantified genomic segment complexity by the proportion of variance explained by  
 25 the first two principal components as well as the number of principal components needed to  
 26 explain at least 90% of the variance of HRC genotypes from each genomic segment.

1 Concordantly, superior autoencoder performance was associated with a low proportion explained  
2 by the first two components and positively correlated with the number of components required to  
3 explained 90% of variance (Spearman  $\rho \geq 0.22$ ,  $p \leq 8.3 \times 10^{-4}$ ). These observations informed our  
4 tuning strategy.

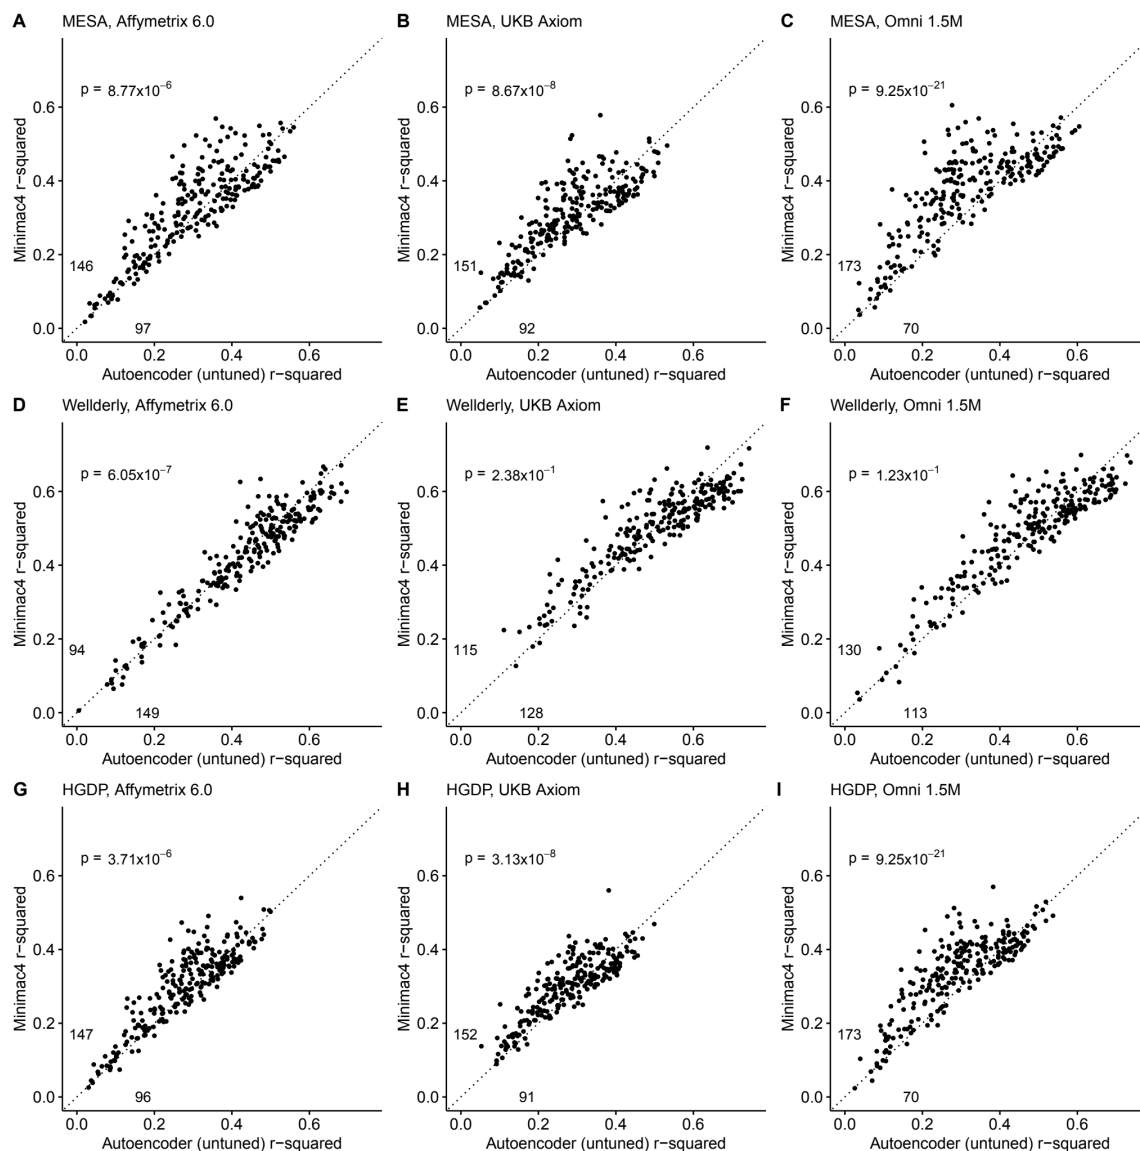

6 **Figure 2. HMM-based (y-axis) versus autoencoder-based (x-axis) imputation accuracy prior**  
7 **to tuning.** Minimac4 and untuned autoencoders were tested across three independent datasets -  
8 MESA (**top**), Wellderly (**middle**), and HGDP (**bottom**) - and across three genotyping array

platforms - Affymetrix 6.0 (**left**), UKB Axiom (**middle**), Omni1.5M (**right**). Each data point represents the imputation accuracy (average r-squared per variant) for an individual genomic segment relative to its WGS-based ground truth. The numerical values presented on the left side and below the identity line (dashed line) indicate the number of genomic segments in which Minimac4 outperformed the untuned autoencoder (left of identity line) and the number of genomic segments in which the untuned autoencoder surpassed Minimac4 (below the identity line). Statistical significance was assessed through two-proportion Z-test p-values.

**Table 2.** Performance comparisons between untuned autoencoder (AE) and HMM-based imputation tools (Minimac4, Beagle5, and Impute5).

|              | MESA         | Wellderly   | HGDP          | Affymetrix 6.0 | UKB Axiom   | Omni 1.5M     | Combined     |
|--------------|--------------|-------------|---------------|----------------|-------------|---------------|--------------|
| AE (untuned) | 0.303±0.008  | 0.470±0.009 | 0.285±0.006   | 0.339±0.008    | 0.356±0.007 | 0.362±0.008   | 0.352±0.008  |
| Minimac4     | 0.337±0.007* | 0.471±0.008 | 0.314±0.006** | 0.352±0.008    | 0.370±0.006 | 0.400±0.007** | 0.374±0.007* |
| Beagle5      | 0.336±0.007* | 0.460±0.008 | 0.296±0.005   | 0.342±0.007    | 0.367±0.006 | 0.384±0.007*  | 0.364±0.007  |
| Impute5      | 0.326±0.007* | 0.458±0.008 | 0.289±0.006   | 0.336±0.008    | 0.354±0.006 | 0.383±0.008*  | 0.358±0.007  |

**Table 2.** Average r-squared per variant was extracted from each genomic segment of chromosome 22. We applied Wilcoxon rank-sum tests to compare the HMM-based tools to the reference untuned autoencoder (AE). \* represents p-values  $\leq 0.05$ , \*\* indicates p-values  $\leq 0.001$ , and \*\*\* indicates p-values  $\leq 0.0001$ .

14

We then used the genomic features significantly correlated with imputation performance to predict the performance of and select the hyperparameter values to advance to fine-tuning. An ensemble model inference approach was able to predict the genomic segment-specific performance of hyperparameter combinations with high accuracy (**Supplemental Figure S4**, mean r-squared =  $0.935 \pm 0.002$  of predicted vs observed autoencoders accuracies via 10-fold cross validation). The top 10 best performing hyperparameter combinations were advanced to fine-tuning (**Table 3**).



1 Autoencoder tuning with simulated offspring formation was then executed as described in

## 2 **Methods.**

3 **Table 3.** Top 10 best performing hyperparameter combinations that advanced to fine-tuning.

| $\lambda_1$ | $\lambda_2$          | $\beta$ | $\rho$ | Activation | Learn rate           | $\gamma$ | Optimizer | Loss type | Hidden layers | Size ratio | Decay |
|-------------|----------------------|---------|--------|------------|----------------------|----------|-----------|-----------|---------------|------------|-------|
| 0.1         | 0                    | 0.01    | 0.01   | tanh       | $1.0 \times 10^{-4}$ | 0        | adam      | CE        | 4             | 1          | 0.95  |
| 0.1         | 0                    | 1       | 0.5    | sigmoid    | $1.0 \times 10^{-4}$ | 1        | adam      | CE        | 2             | 0.9        | 0.95  |
| 0.1         | 0                    | 5       | 0.5    | sigmoid    | $1.0 \times 10^{-1}$ | 4        | adam      | CE        | 2             | 0.5        | 0     |
| 0.1         | 0                    | 1       | 0.005  | relu       | $1.0 \times 10^{-1}$ | 4        | adam      | FL        | 6             | 1          | 0.25  |
| 0.1         | 0                    | 5       | 0.01   | relu       | $1.0 \times 10^{-5}$ | 5        | adam      | FL        | 4             | 1          | 0.95  |
| 0.1         | 0                    | 0.01    | 0.1    | leakyrelu  | $1.0 \times 10^{-5}$ | 0        | adam      | FL        | 8             | 0.9        | 0.95  |
| 0.1         | 0                    | 1       | 0.01   | tanh       | $1.0 \times 10^{-4}$ | 0        | adam      | CE        | 6             | 1          | 0.95  |
| 0           | $1.0 \times 10^{-8}$ | 0.001   | 0.05   | relu       | $1.0 \times 10^{-5}$ | 4        | adam      | CE        | 8             | 0.6        | 0.95  |
| 0.1         | 0                    | 0       | 0.01   | relu       | $1.0 \times 10^{-1}$ | 5        | adam      | FL        | 8             | 0.9        | 0     |
| 0.1         | 0                    | 0.01    | 0.01   | tanh       | $1.0 \times 10^{-3}$ | 5        | adam      | CE        | 2             | 1          | 0.95  |

4 **Table 3.** See **Methods** and **Table 1** for a detailed description of the hyperparameters.

5

## 6 **Tuned Performance.**

7 After tuning, autoencoder performance surpassed HMM-based imputation performance across all  
8 imputation methods, independent test datasets, and genotyping array marker sets. At a minimum,  
9 autoencoders surpassed HMM-based imputation performance in >62% of chromosome 22  
10 genomic segments (two proportion test  $p=1.02 \times 10^{-11}$ ) (Minimac4: **Figure 3**, Beagle5 and Eagle5:  
11 **Supplemental Figures S5-S6**). Overall, the optimized autoencoders exhibited superior  
12 performance with an average r-squared of  $0.395 \pm 0.007$  vs  $0.374 \pm 0.007$  for Minimac4 (Wilcoxon  
13 rank sum test  $p=0.007$ ),  $0.364 \pm 0.007$  for Beagle5 (Wilcoxon rank sum test  $p=1.53 \times 10^{-4}$ ), and  
14  $0.358 \pm 0.007$  for Impute5 (Wilcoxon rank sum test  $p=2.01 \times 10^{-5}$ ) (**Table 4**). This superiority was  
15 robust to the marker sets tested, with the mean r-squared per genomic segment for autoencoders  
16 being  $0.373 \pm 0.008$ ,  $0.399 \pm 0.007$ , and  $0.414 \pm 0.008$  versus  $0.352 \pm 0.008$ ,  $0.370 \pm 0.006$ , and  
17  $0.400 \pm 0.007$  for Minimac4 using Affymetrix 6.0, UKB Axiom, and Omni 1.5M marker sets

- 1 (Wilcoxon rank-sums test p-value=0.029,  $1.99 \times 10^{-4}$ , and 0.087, respectively). Detailed
- 2 comparisons to Beagle5 and Eagle5 are presented in **Supplemental Figures S5-S6**.

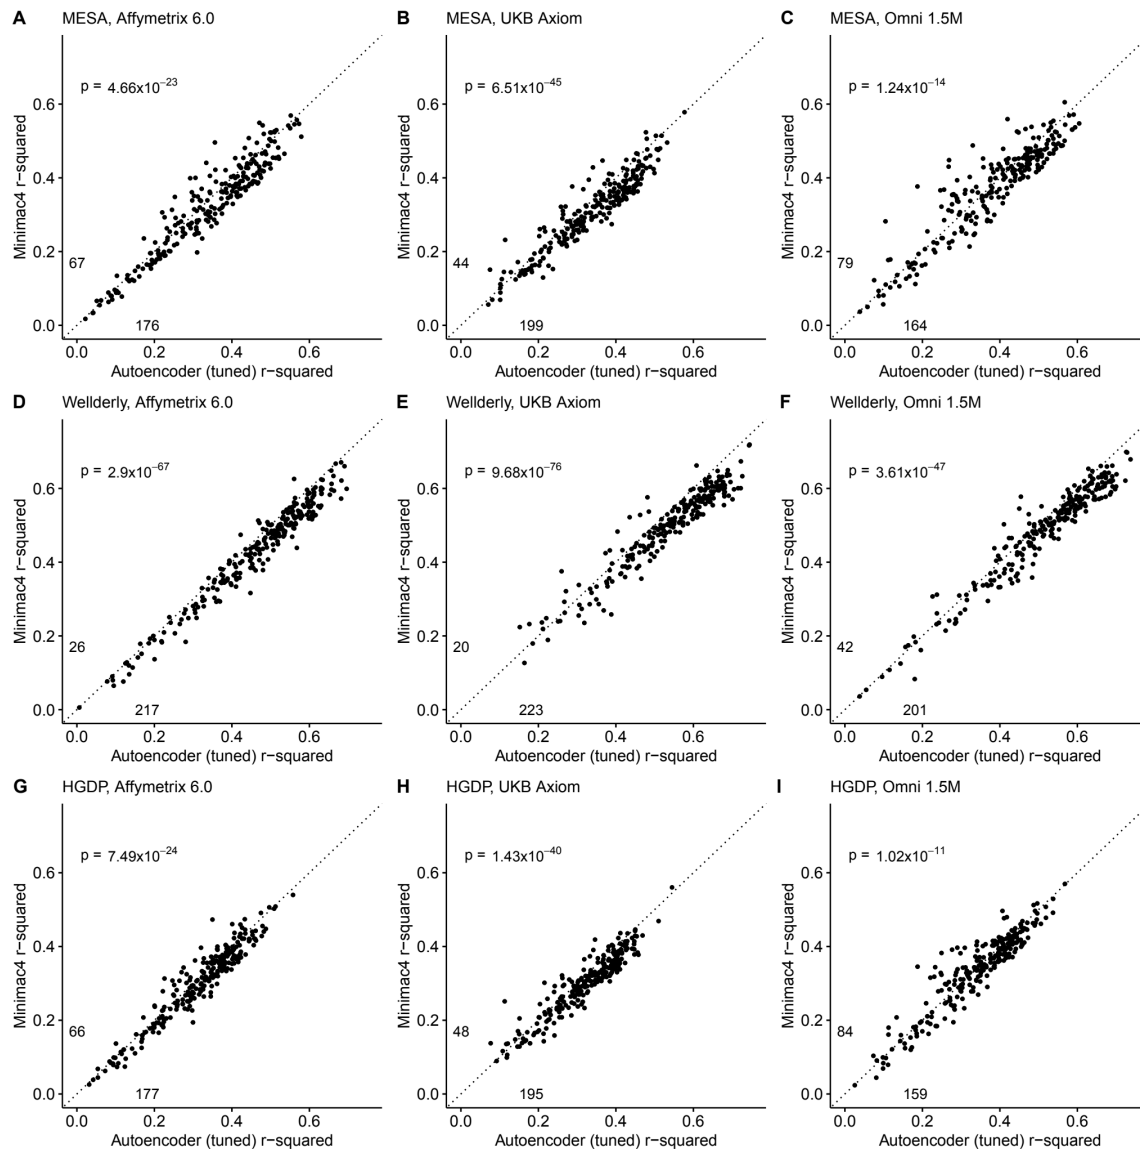

4 **Figure 3. HMM-based (y-axis) versus autoencoder-based (axis) imputation accuracy after**  
5 **tuning.** Minimac4 and tuned autoencoders were validated across three independent datasets -  
6 MESA (**top**), Wellderly (**middle**), and HGDP (**bottom**) - and across three genotyping array  
7 platforms - Affymetrix 6.0 (**left**), UKB Axiom (**middle**), Omni1.5M (**right**). Each data point  
8 represents the imputation accuracy (average r-squared per variant) for an individual genomic

1 segment relative to its WGS-based ground truth. The numerical values presented on the left side  
2 and below the identity line (dashed line) indicate the number of genomic segments in which  
3 Minimac4 outperformed the untuned autoencoder (left of identity line) and the number of genomic  
4 segments in which the untuned autoencoder surpassed Minimac4 (below the identity line).  
5 Statistical significance was assessed through two-proportion Z-test p-values.

6 **Table 4.** Performance comparisons between tuned autoencoder (AE) and HMM-based imputation  
7 tools (Minimac4, Beagle5, and Impute5).

|              | MESA           | Welllderly     | HGDP           | Affymetrix 6.0 | UKB Axiom      | Omni 1.5M      | Combined       |
|--------------|----------------|----------------|----------------|----------------|----------------|----------------|----------------|
| AE (tuned)   | 0.355±0.007    | 0.505±0.008    | 0.327±0.006    | 0.373±0.008    | 0.399±0.007    | 0.414±0.008    | 0.396±0.007    |
| AE (untuned) | 0.303±0.008*** | 0.470±0.009*   | 0.285±0.006*** | 0.339±0.008*   | 0.356±0.007*** | 0.362±0.008*** | 0.352±0.008*** |
| Minimac4     | 0.337±0.007*   | 0.471±0.008**  | 0.314±0.006    | 0.352±0.008*   | 0.370±0.006**  | 0.400±0.007    | 0.374±0.007*   |
| Beagle5      | 0.336±0.007*   | 0.460±0.008*** | 0.296±0.005*** | 0.342±0.007**  | 0.367±0.006*** | 0.384±0.007**  | 0.364±0.007**  |
| Impute5      | 0.326±0.007*   | 0.458±0.008*** | 0.289±0.006*** | 0.336±0.008**  | 0.354±0.006*** | 0.383±0.008**  | 0.358±0.007*** |

8 **Table 4.** Average r-squared per variant was extracted from each genomic segment of  
9 chromosome 22. We applied Wilcoxon rank-sum tests to compare the HMM-based tools to the  
10 reference untuned autoencoder (AE). \* represents p-values  $\leq 0.05$ , \*\* indicates p-values  $\leq 0.001$ ,  
11 and \*\*\* indicates p-values  $\leq 0.0001$ .

12

13 Tuning improved performance of the autoencoders across all genomic segments, generally  
14 improving the superiority of autoencoders relative to HMM-based approaches in genomic  
15 segments with complex haplotype structures while equalizing performance relative to HMM-  
16 based approaches in genomic segments with more simple LD structures (as described in  
17 *Methods*, by the number of unique haplotypes: **Supplemental Figure S7**, diplotypes:  
18 **Supplemental Figure S8**, average pairwise LD: **Supplemental Figure S9**, proportion variance  
19 explained: **Supplemental Figure S10**). Concordantly, genomic segments with higher

1 recombination rates exhibited the largest degree of improvement with tuning (**Supplemental**  
2 **Figure S11**). Use of the augmented reference panel did not improve HMM-based imputation,  
3 having no influence on Minimac4 performance (original overall r-squared of  $0.374 \pm 0.007$  versus  
4  $0.363 \pm 0.007$  after augmentation, Wilcoxon rank-sum test  $p=0.0917$ ), and significantly degrading  
5 performance of Beagle5 and Impute5 (original r-squared of  $0.364 \pm 0.007$  and  $0.358 \pm 0.007$  versus  
6  $0.349 \pm 0.006$  and  $0.324 \pm 0.007$  after augmentation,  $p=0.026$  and  $p=1.26 \times 10^{-4}$  respectively).  
7 Summary statistics for these comparisons are available in **Supplemental Table S1**.

### 8 **Overall Chromosome 22 Imputation Accuracy.**

9 After merging the results from all genomic segments, the whole chromosome accuracy of  
10 autoencoder-based imputation remained superior to all HMM-based imputation tools, across all  
11 independent test datasets, and all genotyping array marker sets (Wilcoxon rank-sums test  
12  $p \leq 5.55 \times 10^{-67}$ ). The autoencoder's mean r-squared per variant ranged from 0.363 for HGDP to  
13 0.605 for the Welllderly vs 0.340 to 0.557 for Minimac4, 0.326 to 0.549 for Beagle5, and 0.314 to  
14 0.547 for Eagle5, respectively. Detailed comparisons are presented in in **Table 5** and  
15 **Supplemental Table S2**.

16 Further, when imputation accuracy is stratified by MAF bins, the autoencoders maintain  
17 superiority across all MAF bins by nearly all test dataset and genotyping array marker sets  
18 (**Figure 4**, and **Supplemental Table S3**). Concordantly, autoencoder imputation accuracy is  
19 similarly superior when measured with F1-scores (**Supplemental Figure S12**) and concordance  
20 (**Supplemental Figure S13**), though these metrics are less sensitive at capturing differences in  
21 rare variant imputation accuracy.

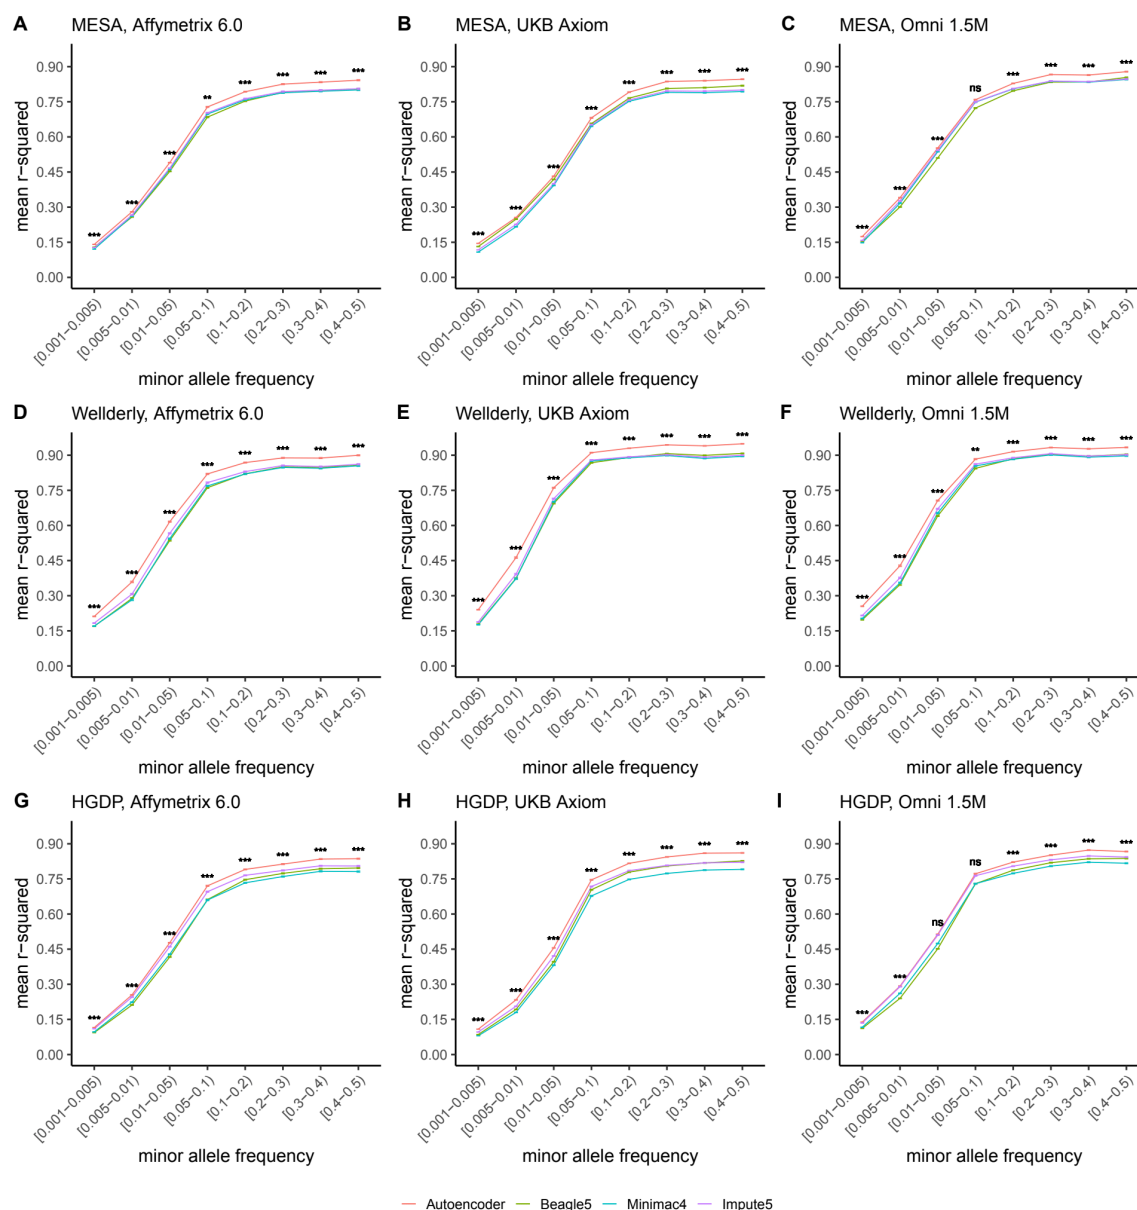

2 **Figure 4. HMM-based versus autoencoder-based imputation accuracy across MAF bins.**  
3 Autoencoder-based (red) and HMM-based (Minimac4 (blue), Beagle5 (green), and Impute5  
4 (purple)) imputation accuracy was validated across three independent datasets - MESA (top),  
5 Welllderly (middle), and HGDP (bottom) - and across three genotyping array platforms - Affymetrix  
6 6.0 (left), UKB Axiom (middle), Omni1.5M (right). Each data point represents the imputation  
7 accuracy (average r-squared per variant) relative to WGS-based ground truth across MAF bins.

1 Error bars represent standard errors. We applied Wilcoxon rank-sum tests to compare the HMM-  
2 based tools to the tuned autoencoder (AE). \* represents p-values  $\leq 0.05$ , \*\* indicates p-values  $\leq$   
3 0.001, and \*\*\* indicates p-values  $\leq 0.0001$ , ns represents non-significant p-values.

4 **Table 5.** Whole chromosome level comparisons between autoencoder (AE) and HMM-based  
5 imputation tools (Minimac4, Beagle5, and Impute5).

|               | MESA           |           |           | Welllderly     |           |           | HGDP           |           |           |
|---------------|----------------|-----------|-----------|----------------|-----------|-----------|----------------|-----------|-----------|
|               | Affymetrix 6.0 | UKB Axiom | Omni 1.5M | Affymetrix 6.0 | UKB Axiom | Omni 1.5M | Affymetrix 6.0 | UKB Axiom | Omni 1.5M |
| AE<br>(tuned) | 0.410          | 0.395     | 0.452     | 0.537          | 0.605     | 0.586     | 0.363          | 0.364     | 0.392     |
| Minimac4      | 0.390***       | 0.364***  | 0.436***  | 0.500***       | 0.557***  | 0.551***  | 0.350***       | 0.340***  | 0.385***  |
| Beagle5       | 0.383***       | 0.379***  | 0.420***  | 0.484***       | 0.549***  | 0.534***  | 0.326***       | 0.328***  | 0.353***  |
| Impute5       | 0.384***       | 0.356***  | 0.429***  | 0.485***       | 0.547***  | 0.539***  | 0.328***       | 0.314***  | 0.359***  |

6 **Table 5.** Average r-squared per variant was extracted at whole chromosome level. We  
7 applied Wilcoxon rank-sum tests to compare the HMM-based tools to the reference tuned  
8 autoencoder (AE). \* represents p-values  $\leq 0.05$ , \*\* indicates p-values  $\leq 0.001$ , and \*\*\* indicates p-  
9 values  $\leq 0.0001$ . Standard errors that are equal or less than 0.001 are not shown.

10

# 11 **Ancestry-Specific Chromosome 22 Imputation Accuracy.**

12 Finally, we evaluated ancestry-specific imputation accuracy. As before, overall autoencoder-  
13 based imputation maintains superiority across all continental populations present in MESA  
14 (**Figure 5**, Wilcoxon rank-sums test  $p=5.39 \times 10^{-19}$ ). The autoencoders' mean r-squared ranged  
15 from 0.357 for African ancestry to 0.614 for East Asian ancestry vs 0.328 to 0.593 for Minimac4,  
16 0.330 to 0.544 for Beagle5, and 0.324 to 0.586 for Impute5, respectively. Note, East Asian  
17 ancestry exhibits a slightly higher overall imputation accuracy relative to European ancestry due  
18 to improved rare variant imputation. Autoencoder superiority replicates when HGDP is split into  
19 continental populations (**Supplemental Figure S14**).

1 Further stratification of ancestry-specific imputation accuracy results by MAF continues to support  
2 autoencoder superiority across all ancestries, MAF bins, and nearly all test datasets, and  
3 genotyping array marker sets (**Figure 5, Supplemental Figure S14**). Minimum and maximum  
4 accuracies across MAF by ancestry bins ranged between 0.177 to 0.937 for the autoencoder,  
5 0.132 to 0.907 for Minimac4, 0.147 to 0.909 for Beagle5, and 0.115 to 0.903 for Impute5, with a  
6 maximum standard error of  $\pm 0.004$ .

7 Thus, autoencoder performance was superior across all variant allele frequencies and ancestries  
8 with the primary source of superiority arising from hard to impute regions with complex LD  
9 structures.

#### 10 **Inference Speed.**

11 Inference runtimes for the autoencoder vs HMM-based methods were compared in a low-end and  
12 high-end computational environment as described in *Methods*. In the low-end environment, the  
13 autoencoder's inference time is at least ~4X faster than all HMM-based inference times (summing  
14 all inference times from all genomic segments of chromosome 22, the inference time for the  
15 autoencoder was  $2.4 \pm 1.1 \times 10^{-3}$  seconds versus  $1,754 \pm 3.2$ ,  $583.3 \pm 0.01$ , and  $8.4 \pm 4.3 \times 10^{-3}$  seconds  
16 for Minimac4, Beagle5, and Impute5, respectively (**Figure 6A**)). In the high-end environment, this  
17 difference narrows to a ~3X advantage of the autoencoder vs HMM-based methods ( $2.1 \pm 8.0 \times 10^{-4}$   
18 versus  $374.3 \pm 1.2$ ,  $414.3 \pm 0.01$ , and  $6.1 \pm 2.1 \times 10^{-4}$  seconds for Minimac4, Beagle5, and Impute5,  
19 respectively (**Figure 6B**). These unoptimized results indicate that autoencoder-based imputation  
20 can be executed rapidly, without a reference cohort, and without the need for a high-end server or  
21 high-performance computing (HPC) infrastructure.

22

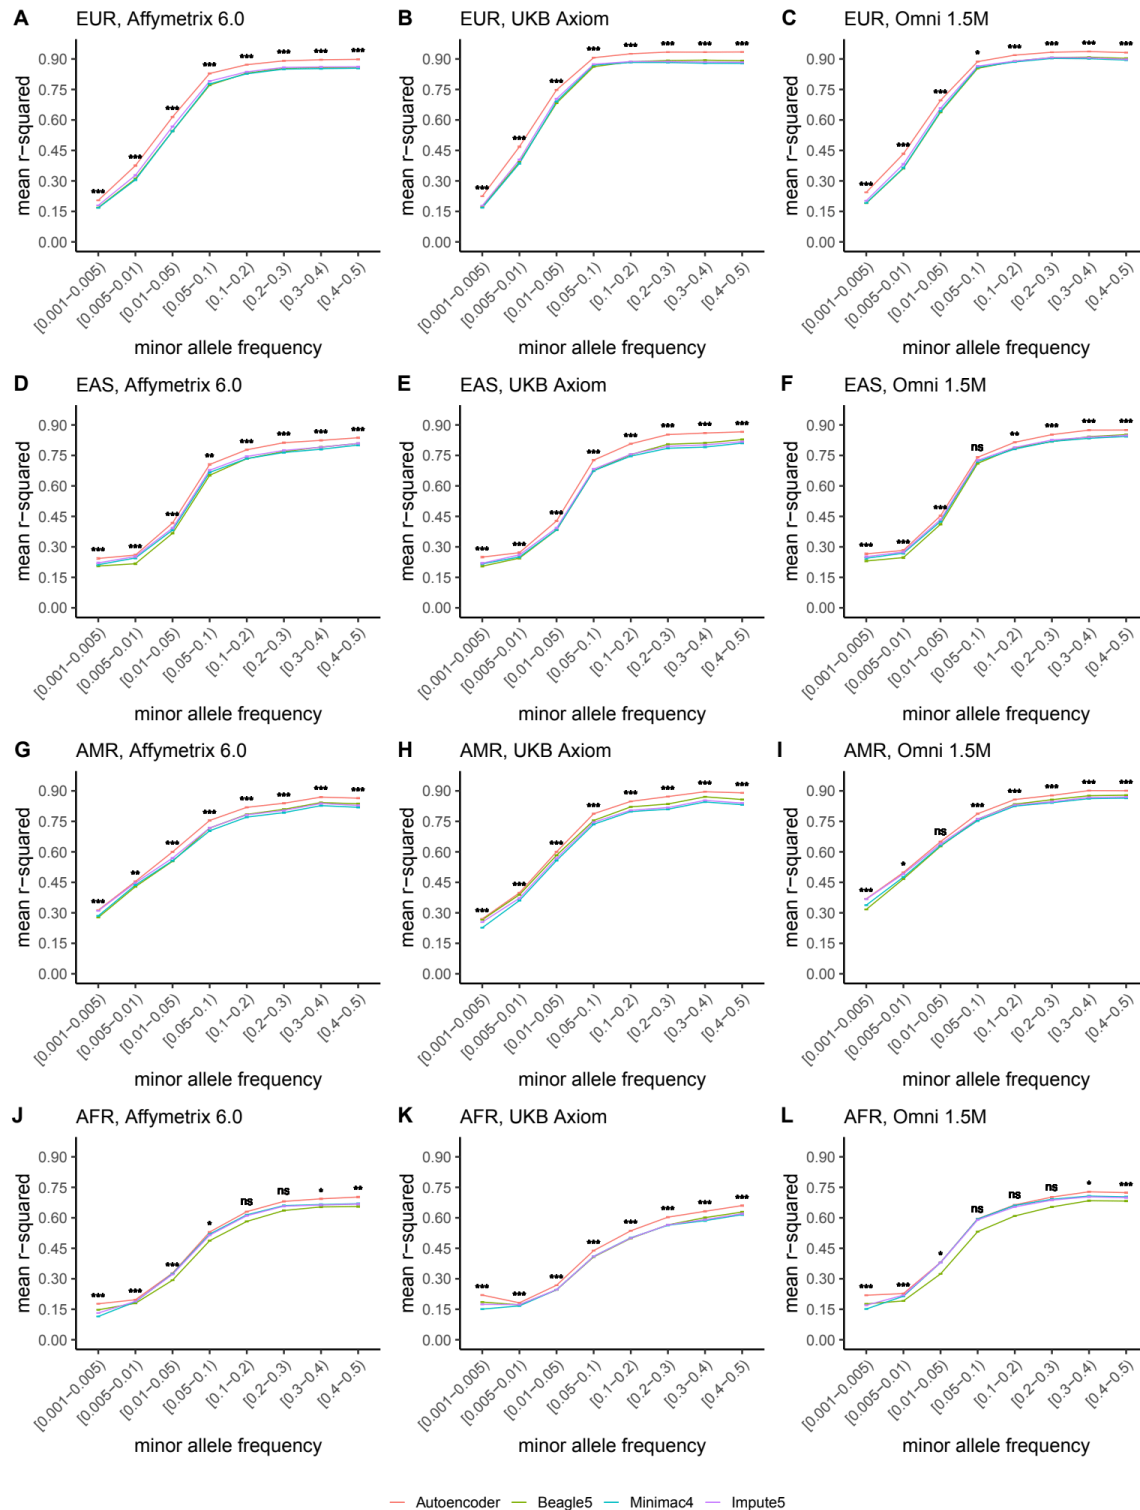



1 Impute5 (**purple**) imputation accuracy was validated across individuals of diverse ancestry from  
2 MESA cohort (EUR: European (**top**); EAS: East Asian (**2<sup>nd</sup> row**); AMR: Native American (**3<sup>rd</sup> row**);  
3 AFR: African (**bottom**)) and multiple genotype array platforms (Affymetrix 6.0 (**left**), UKB Axiom  
4 (**middle**), Omni1.5M (**right**)). Each data point represents the imputation accuracy (average r-  
5 squared per variant) relative to WGS-based ground truth across MAF bins. Error bars represent  
6 standard errors. We applied Wilcoxon rank-sum tests to compare the HMM-based tools to the tuned  
7 autoencoder (AE). \* represents p-values  $\leq 0.05$ , \*\* indicates p-values  $\leq 0.001$ , and \*\*\* indicates p-  
8 values  $\leq 0.0001$ , ns represents non-significant p-values.

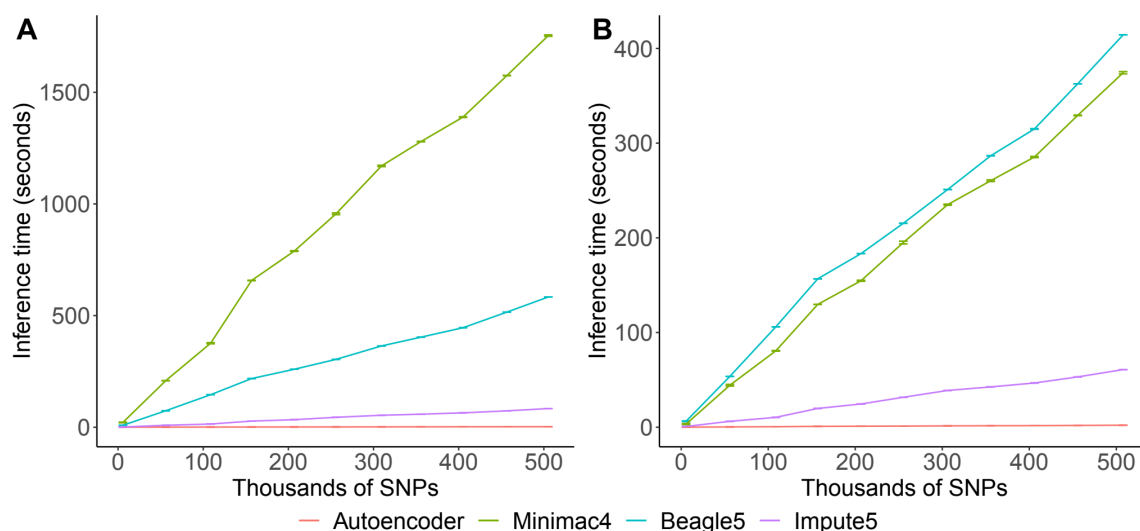

10 **Figure 6. HMM-based versus autoencoder-based inference runtimes.** We plot the average time  
11 and standard error of three imputation replicates. Two hardware configurations were used for the  
12 tests: A) a low-end environment: 16-core Intel Xeon CPU (E5-2640 v2 2.00GHz), 250GB RAM, and  
13 one GPU (NVIDIA GTX 1080); B) a high-end environment: 24-Core AMD CPU (EPYC 7352  
14 2.3GHz), 250GB RAM, using one NVIDIA A100 GPU.

# 1 Discussion

2 Artificial neural network-based data mining techniques are revolutionizing biomedical informatics  
3 and analytics(Dias and Torkamani, 2019; Jumper et al., 2021). Here, we have demonstrated the  
4 potential for these techniques to execute a fundamental analytical task in population genetics,  
5 genotype imputation, producing superior results in a computational efficient and portable  
6 framework. The trained autoencoders can be transferred easily, and execute their functions  
7 rapidly, even in modest computing environments, obviating the need to transfer private genotype  
8 data to external imputation servers or services. Furthermore, our fully trained autoencoders  
9 robustly surpass the performance of all modern HMM-based imputation approaches across all  
10 tested independent datasets, genotyping array marker sets, minor allele frequency spectra, and  
11 diverse ancestry groups. This superiority was most apparent in genomic regions with low LD  
12 and/or high complexity in their linkage disequilibrium structure.

13 Superior imputation accuracy is expected to improve GWAS power, enable more complete  
14 coverage in meta-analyses, and improve causal variant identification through fine-mapping.  
15 Moreover, superior imputation accuracy in low LD regions may enable the more accurate  
16 interrogation of specific classes of genes under a greater degree of selective pressure and  
17 involved in environmental sensing. For example, promoter regions of genes associated with  
18 inflammatory immune responses, response to pathogens, environmental sensing, and  
19 neurophysiological processes (including sensory perception genes) are often located in regions of  
20 low LD (Dias and Torkamani, 2019; Frazer et al., 2007). These known disease-associated  
21 biological processes that are critical to interrogate accurately in GWAS. Thus, the autoencoder-  
22 based imputation approach both improves statistical power and biological coverage of individual  
23 GWAS' and downstream meta-analyses.

24 HMM-based imputation tools depend on large reference panels or datasets to impute a single  
25 genome whereas pre-trained autoencoder models eliminate that dependency. However, further  
26 development is required to actualize this approach in practice for broad adoption. Autoencoders

must be pre-trained and validated across all segments of the human genome. Here we performed training only for chromosome 22. Autoencoder training is computationally intensive, shifting the computational burden to model trainers, and driving performance gains for end-users. As a result, inference time scales only with the number of variants to be imputed, whereas HMM-based inference time depends on both reference panel and the number of variants to be imputed. This allows for autoencoder-based imputation to extend to millions of genomes but introduces some challenges in the continuous re-training and fine-tuning of the pre-trained models as larger reference panels are made available. In addition, our current encoding approach lacks phasing information, which leads to substantial improvements in imputation accuracy. Future models will need to address the need for phasing and continuous fine-tuning of models for application to modern, ever-growing, genomic datasets.

### **Ideas and Speculation**

After expanding this approach across the whole genome, our work will provide a more efficient genotype imputation platform on whole genome scale and thus beneficial for genome association studies and clinical applications in precision medicine. In addition to the speed, cost and accuracy benefits, our proposed approach can potentially improve automation for downstream analyses. The autoencoder naturally generates a hidden encoding with latent features representative of the original data. This latent representation of the original data acts as an automatic feature extraction and dimensionality reduction technique for downstream tasks such as genetic risk prediction. Moreover, the autoencoder-based imputation approach only requires a reference panel during training – only the neural network needs to be distributed for implementation. Thus, the neural network is portable and avoids privacy issues associated with standard statistical imputation. This privacy-preserving feature will allow developers to deploy real-time data-driven algorithms on personal devices (edge computing). These new features will expand the clinical applications of genomic imputation, as well as its role in preventive healthcare.

## 1 Acknowledgments

2 This work is supported by KL2TR002552 to RD, by R01HG010881 to AT as well as grants  
3 U24TR002306 and UL1TR002550. We would like to thank J.C. Ducom and Lisa Dong from the  
4 Scripps High Performance Computing center, as well as Fernanda Foertter, Johnny Israeli, Ohad  
5 Mosafi, and Joyjit Daw from NVIDIA for their technical support and collaboration in this project. A  
6 portion of this research was conducted using a startup account at the Summit supercomputer  
7 from Oak Ridge National Laboratory (ORNL).

## 9 Competing interests

10 The authors declare no competing interests.

## 12 References

- 13 Abouzid H, Chakkor O, Reyes OG, Ventura S. 2019. Signal speech reconstruction and noise  
14 removal using convolutional denoising audioencoders with neural deep learning. *Analog*  
15 *Integrated Circuits and Signal Processing* **100**:501–512. doi:10.1007/s10470-019-01446-6
- 16 Alexander DH, Novembre J, Lange K. 2009. Fast model-based estimation of ancestry in  
17 unrelated individuals. *Genome Research* **19**:1655–1664. doi:10.1101/gr.094052.109
- 18 Arisdakessian C, Poirion O, Yunits B, Zhu X, Garmire LX. 2019. DeepImpute: An accurate, fast,  
19 and scalable deep neural network method to impute single-cell RNA-seq data. *Genome*  
20 *Biology* **20**:211. doi:10.1186/s13059-019-1837-6
- 21 Auton A, Abecasis GR, Altshuler DM, Durbin RM, Bentley DR, Chakravarti A, Clark AG, Donnelly  
22 P, Eichler EE, Flicek P, Gabriel SB, Gibbs RA, Green ED, Hurles ME, Knoppers BM, Korbel  
23 JO, Lander ES, Lee C, Leirach H, Mardis ER, Marth GT, McVean GA, Nickerson DA,  
24 Schmidt JP, Sherry ST, Wang J, Wilson RK, Boerwinkle E, Doddapaneni H, Han Y,  
25 Korchina V, Kovar C, Lee S, Muzny D, Reid JG, Zhu Y, Chang Y, Feng Q, Fang X, Guo X,  
26 Jian M, Jiang H, Jin X, Lan T, Li G, Li J, Li Yingrui, Liu S, Liu Xiao, Lu Y, Ma X, Tang M,

1 Wang B, Wang G, Wu H, Wu R, Xu X, Yin Y, Zhang D, Zhang W, Zhao J, Zhao M, Zheng X,  
2 Gupta N, Gharani N, Toji LH, Gerry NP, Resch AM, Barker J, Clarke L, Gil L, Hunt SE,  
3 Kelman G, Kulesha E, Leinonen R, McLaren WM, Radhakrishnan R, Roa A, Smirnov D,  
4 Smith RE, Streeter I, Thormann A, Toneva I, Vaughan B, Zheng-Bradley X, Grocock R,  
5 Humphray S, James T, Kingsbury Z, Sudbrak R, Albrecht MW, Amstislavskiy VS, Borodina  
6 TA, Lienhard M, Mertes F, Sultan M, Timmermann B, Yaspo ML, Fulton L, Ananiev V,  
7 Belaia Z, Beloslyudtsev D, Bouk N, Chen C, Church D, Cohen R, Cook C, Garner J,  
8 Hefferon T, Kimelman M, Liu C, Lopez J, Meric P, O'Sullivan C, Ostapchuk Y, Phan L,  
9 Ponomarov S, Schneider V, Shekhtman E, Sirotkin K, Slotta D, Zhang H, Balasubramaniam  
10 S, Burton J, Danecek P, Keane TM, Kolb-Kokocinski A, McCarthy S, Stalker J, Quail M,  
11 Davies CJ, Gollub J, Webster T, Wong B, Zhan Y, Campbell CL, Kong Y, Marcketta A, Yu  
12 F, Antunes L, Bainbridge M, Sabo A, Huang Z, Coin LJM, Fang L, Li Q, Li Z, Lin H, Liu B,  
13 Luo R, Shao H, Xie Y, Ye C, Yu C, Zhang F, Zheng H, Zhu H, Alkan C, Dal E, Kahveci F,  
14 Garrison EP, Kural D, Lee WP, Leong WF, Stromberg M, Ward AN, Wu J, Zhang M, Daly  
15 MJ, DePristo MA, Handsaker RE, Banks E, Bhatia G, del Angel G, Genovese G, Li H,  
16 Kashin S, McCarroll SA, Nemesh JC, Poplin RE, Yoon SC, Lihm J, Makarov V, Gottipati S,  
17 Keinan A, Rodriguez-Flores JL, Rausch T, Fritz MH, Stütz AM, Beal K, Datta A, Herrero J,  
18 Ritchie GRS, Zerbino D, Sabeti PC, Shlyakhter I, Schaffner SF, Vitti J, Cooper DN, Ball E v.,  
19 Stenson PD, Barnes B, Bauer M, Cheetham RK, Cox A, Eberle M, Kahn S, Murray L, Peden  
20 J, Shaw R, Kenny EE, Batzer MA, Konkel MK, Walker JA, MacArthur DG, Lek M, Herwig R,  
21 Ding L, Koboldt DC, Larson D, Ye Kai, Gravel S, Swaroop A, Chew E, Lappalainen T, Erlich  
22 Y, Gymrek M, Willems TF, Simpson JT, Shriver MD, Rosenfeld JA, Bustamante CD,  
23 Montgomery SB, de La Vega FM, Byrnes JK, Carroll AW, DeGorter MK, Lacroute P, Maples  
24 BK, Martin AR, Moreno-Estrada A, Shringarpure SS, Zakharia F, Halperin E, Baran Y,  
25 Cerveira E, Hwang J, Malhotra A, Plewczynski D, Radew K, Romanovitch M, Zhang C,  
26 Hyland FCL, Craig DW, Christoforides A, Homer N, Izatt T, Kurdoglu AA, Sinari SA, Squire  
27 K, Xiao C, Sebat J, Antaki D, Gujral M, Noor A, Ye Kenny, Burchard EG, Hernandez RD,

1 Gignoux CR, Haussler D, Katzman SJ, Kent WJ, Howie B, Ruiz-Linares A, Dermitzakis ET,  
2 Devine SE, Kang HM, Kidd JM, Blackwell T, Caron S, Chen W, Emery S, Fritsche L,  
3 Fuchsberger C, Jun G, Li B, Lyons R, Scheller C, Sidore C, Song S, Sliwerska E, Taliun D,  
4 Tan A, Welch R, Wing MK, Zhan X, Awadalla P, Hodgkinson A, Li Yun, Shi X, Quitadamo A,  
5 Lunter G, Marchini JL, Myers S, Churchhouse C, Delaneau O, Gupta-Hinch A, Kretzschmar  
6 W, Iqbal Z, Mathieson I, Menelaou A, Rimmer A, Xifara DK, Oleksyk TK, Fu Yunxin, Liu  
7 Xiaoming, Xiong M, Jorde L, Witherspoon D, Xing J, Browning BL, Browning SR,  
8 Hormozdiari F, Sudmant PH, Khurana E, Tyler-Smith C, Albers CA, Ayub Q, Chen Y,  
9 Colonna V, Jostins L, Walter K, Xue Y, Gerstein MB, Abyzov A, Balasubramanian S, Chen  
10 J, Clarke D, Fu Yao, Harmanici AO, Jin M, Lee D, Liu J, Mu XJ, Zhang J, Zhang Yan, Hartl  
11 C, Shakir K, Degenhardt J, Meiers S, Raeder B, Casale FP, Stegle O, Lameijer EW, Hall I,  
12 Bafna V, Michaelson J, Gardner EJ, Mills RE, Dayama G, Chen K, Fan X, Chong Z, Chen T,  
13 Chaisson MJ, Huddleston J, Malig M, Nelson BJ, Parrish NF, Blackburne B, Lindsay SJ,  
14 Ning Z, Zhang Yujun, Lam H, Sisu C, Challis D, Evani US, Lu J, Nagaswamy U, Yu J, Li W,  
15 Habegger L, Yu H, Cunningham F, Dunham I, Lage K, Jespersen JB, Horn H, Kim D,  
16 Desalle R, Narechania A, Sayres MAW, Mendez FL, Poznik GD, Underhill PA, Mittelman D,  
17 Banerjee R, Cerezo M, Fitzgerald TW, Louzada S, Massaia A, Yang F, Kalra D, Hale W,  
18 Dan X, Barnes KC, Beiswanger C, Cai H, Cao H, Henn B, Jones D, Kaye JS, Kent A,  
19 Kerasidou A, Mathias R, Ossorio PN, Parker M, Rotimi CN, Royal CD, Sandoval K, Su Y,  
20 Tian Z, Tishkoff S, Via M, Wang Y, Yang H, Yang L, Zhu J, Bodmer W, Bedoya G, Cai Z,  
21 Gao Y, Chu J, Peltonen L, Garcia-Montero A, Orfao A, Dutil J, Martinez-Cruzado JC,  
22 Mathias RA, Hennis A, Watson H, McKenzie C, Qadri F, LaRocque R, Deng X, Asogun D,  
23 Folarin O, Happi C, Omoniwa O, Stremlau M, Tariyal R, Jallow M, Joof FS, Corrah T,  
24 Rockett K, Kwiatkowski D, Kooner J, Hien TT, Dunstan SJ, ThuyHang N, Fonnier R, Garry  
25 R, Kanneh L, Moses L, Schieffelin J, Grant DS, Gallo C, Poletti G, Saleheen D, Rasheed A,  
26 Brooks LD, Felsenfeld AL, McEwen JE, Vaydylevich Y, Duncanson A, Dunn M, Schloss JA.  
27 2015. A global reference for human genetic variation. *Nature*. doi:10.1038/nature15393

- 1 Berisa T, Pickrell JK. 2016. Approximately independent linkage disequilibrium blocks in human  
2 populations. *Bioinformatics* **32**:283–285. doi:10.1093/bioinformatics/btv546
- 3 Bild DE. 2002. Multi-Ethnic Study of Atherosclerosis: Objectives and Design. *American Journal of*  
4 *Epidemiology* **156**:871–881. doi:10.1093/aje/kwf113
- 5 Browning BL, Browning SR. 2016. Genotype Imputation with Millions of Reference Samples.  
6 *American Journal of Human Genetics* **98**:116–126. doi:10.1016/j.ajhg.2015.11.020
- 7 Browning BL, Zhou Y, Browning SR. 2018. A One-Penny Imputed Genome from Next-Generation  
8 Reference Panels. *American Journal of Human Genetics* **103**:338–348.  
9 doi:10.1016/j.ajhg.2018.07.015
- 10 Cann HM. 2002. A Human Genome Diversity Cell Line Panel. *Science* **296**:261b–2262.  
11 doi:10.1126/science.296.5566.261b
- 12 Chen J, Shi X. 2019. Sparse Convolutional Denoising Autoencoders for Genotype Imputation.  
13 *Genes* **10**:652. doi:10.3390/genes10090652
- 14 Danecek P, Bonfield JK, Liddle J, Marshall J, Ohan V, Pollard MO, Whitwham A, Keane T,  
15 McCarthy SA, Davies RM, Li H. 2021. Twelve years of SAMtools and BCFtools.  
16 *GigaScience* **10**:1–4. doi:10.1093/gigascience/giab008
- 17 Das S, Abecasis GR, Browning BL. 2018. Genotype Imputation from Large Reference Panels.  
18 *Annual Review of Genomics and Human Genetics* **19**:73–96. doi:10.1146/annurev-genom-  
19 083117-021602
- 20 Das S, Forer L, Schön herr S, Sidore C, Locke AE, Kwong A, Vrieze SI, Chew EY, Levy S, McGue  
21 M, Schlessinger D, Stambolian D, Loh PR, Iacono WG, Swaroop A, Scott LJ, Cucca F,  
22 Kronenberg F, Boehnke M, Abecasis GR, Fuchsberger C. 2016a. Next-generation genotype  
23 imputation service and methods. *Nature Genetics* **48**:1284–1287. doi:10.1038/ng.3656

1 Das S, Forer L, Schönherr S, Sidore C, Locke AE, Kwong A, Vrieze SI, Chew EY, Levy S, McGue  
2 M, Schlessinger D, Stambolian D, Loh PR, Iacono WG, Swaroop A, Scott LJ, Cucca F,  
3 Kronenberg F, Boehnke M, Abecasis GR, Fuchsberger C. 2016b. Next-generation genotype  
4 imputation service and methods. *Nature Genetics* **48**:1284–1287. doi:10.1038/ng.3656

5 Dias R, Torkamani A. 2019. Artificial intelligence in clinical and genomic diagnostics. *Genome*  
6 *Medicine*. doi:10.1186/s13073-019-0689-8

7 Dimitromanolakis A, Xu J, Krol A, Briollais L. 2019. sim1000G: A user-friendly genetic variant  
8 simulator in R for unrelated individuals and family-based designs. *BMC Bioinformatics*  
9 **20**:26. doi:10.1186/s12859-019-2611-1

10 Erikson GA, Bodian DL, Rueda M, Molparia B, Scott ER, Scott-Van Zeeland AA, Topol SE,  
11 Wineinger NE, Niederhuber JE, Topol EJ, Torkamani A. 2016. Whole-Genome Sequencing  
12 of a Healthy Aging Cohort. *Cell* **165**:1002–1011. doi:10.1016/j.cell.2016.03.022

13 Frazer KA, Ballinger DG, Cox DR, Hinds DA, Stuve LL, Gibbs RA, Belmont JW, Boudreau A,  
14 Hardenbol P, Leal SM, Pasternak S, Wheeler DA, Willis TD, Yu F, Yang H, Zeng C, Gao Y,  
15 Hu H, Hu W, Li C, Lin W, Liu S, Pan H, Tang X, Wang J, Wang W, Yu J, Zhang B, Zhang Q,  
16 Zhao Hongbin, Zhao Hui, Zhou J, Gabriel SB, Barry R, Blumenstiel B, Camargo A, Defelice  
17 M, Faggart M, Goyette M, Gupta S, Moore J, Nguyen H, Onofrio RC, Parkin M, Roy J, Stahl  
18 E, Winchester E, Ziaugra L, Altshuler D, Shen Yan, Yao Z, Huang W, Chu X, He Y, Jin L,  
19 Liu Y, Shen Yayun, Sun W, Wang Haifeng, Wang Yi, Wang Ying, Xiong X, Xu L, Wayne  
20 MMY, Tsui SKW, Xue H, Wong JTF, Galver LM, Fan JB, Gunderson K, Murray SS, Oliphant  
21 AR, Chee MS, Montpetit A, Chagnon F, Ferretti V, Leboeuf M, Olivier JF, Phillips MS,  
22 Roumy S, Sallée C, Verner A, Hudson TJ, Kwok PY, Cai D, Koboldt DC, Miller RD,  
23 Pawlikowska L, Taillon-Miller P, Xiao M, Tsui LC, Mak W, You QS, Tam PKH, Nakamura Y,  
24 Kawaguchi T, Kitamoto T, Morizono T, Nagashima A, Ohnishi Y, Sekine A, Tanaka T,  
25 Tsunoda T, Deloukas P, Bird CP, Delgado M, Dermitzakis ET, Gwilliam R, Hunt S, Morrison  
26 J, Powell D, Stranger BE, Whittaker P, Bentley DR, Daly MJ, de Bakker PIW, Barrett J,



1 Chretien YR, Maller J, McCarroll S, Patterson N, Pe'Er I, Price A, Purcell S, Richter DJ,  
2 Sabeti P, Saxena R, Schaffner SF, Sham PC, Varilly P, Stein LD, Krishnan L, Smith AV,  
3 Tello-Ruiz MK, Thorisson GA, Chakravarti A, Chen PE, Cutler DJ, Kashuk CS, Lin S,  
4 Abecasis GR, Guan W, Li Y, Munro HM, Qin ZS, Thomas DJ, McVean G, Auton A, Bottolo  
5 L, Cardin N, Eyheramendy S, Freeman C, Marchini J, Myers S, Spencer C, Stephens M,  
6 Donnelly P, Cardon LR, Clarke G, Evans DM, Morris AP, Weir BS, Johnson TA, Mullikin JC,  
7 Sherry ST, Feolo M, Skol A, Zhang H, Matsuda I, Fukushima Y, MacEr DR, Suda E, Rotimi  
8 CN, Adebamowo CA, Ajayi I, Aniagwu T, Marshall PA, Nkwodimmah C, Royal CDM,  
9 Leppert MF, Dixon M, Peiffer A, Qiu R, Kent A, Kato K, Niikawa N, Adewole IF, Knoppers  
10 BM, Foster MW, Clayton EW, Watkin J, Muzny D, Nazareth L, Sodergren E, Weinstock GM,  
11 Yakub I, Birren BW, Wilson RK, Fulton LL, Rogers J, Burton J, Carter NP, Clee CM, Griffiths  
12 M, Jones MC, McLay K, Plumb RW, Ross MT, Sims SK, Willey DL, Chen Z, Han H, Kang L,  
13 Godbout M, Wallenburg JC, L'Archevêque P, Bellemare G, Saeki K, Wang Hongguang, An  
14 D, Fu H, Li Q, Wang Z, Wang R, Holden AL, Brooks LD, McEwen JE, Guyer MS, Wang VO,  
15 Peterson JL, Shi M, Spiegel J, Sung LM, Zacharia LF, Collins FS, Kennedy K, Jamieson R,  
16 Stewart J. 2007. A second generation human haplotype map of over 3.1 million SNPs.  
17 *Nature* **449**:851–861. doi:10.1038/nature06258

18 Islam T, Kim CH, Iwata H, Shimono H, Kimura A, Zaw H, Raghavan C, Leung H, Singh RK. 2021.  
19 A Deep Learning Method to Impute Missing Values and Compress Genome-ide  
20 Polymorphism Data in Rice In: Lorenz R, Fred ALN, Gamboa H, editors. Proceedings of the  
21 14th International Joint Conference on Biomedical Engineering Systems and Technologies,  
22 {BIOSTEC} 2021, Volume 3: BIOINFORMATICS, Online Streaming, February 11-13, 2021.  
23 SCITEPRESS. pp. 101–109.

24 Jumper J, Evans R, Pritzel A, Green T, Figurnov M, Ronneberger O, Tunyasuvunakool K, Bates  
25 R, Žídek A, Potapenko A, Bridgland A, Meyer C, Kohl SAA, Ballard AJ, Cowie A, Romera-  
26 Paredes B, Nikolov S, Jain R, Adler J, Back T, Petersen S, Reiman D, Clancy E, Zielinski M,

1 Steinegger M, Pacholska M, Berghammer T, Bodenstein S, Silver D, Vinyals O, Senior AW,  
2 Kavukcuoglu K, Kohli P, Hassabis D. 2021. Highly accurate protein structure prediction with  
3 AlphaFold. *Nature* 1–7. doi:10.1038/s41586-021-03819-2

4 Koh PW, Pierson E, Kundaje A. 2017. Denoising genome-wide histone ChIP-seq with  
5 convolutional neural networks. *Bioinformatics* **33**:i225–i233.  
6 doi:10.1093/bioinformatics/btx243

7 Kojima K, Tadaka S, Katsuoka F, Tamiya G, Yamamoto M, Kinoshita K. 2020. A genotype  
8 imputation method for de-identified haplotype reference information by using recurrent  
9 neural network. *PLoS Computational Biology* **16**:e1008207.  
10 doi:10.1371/journal.pcbi.1008207

11 Kowalski MH, Qian H, Hou Z, Rosen JD, Tapia AL, Shan Y, Jain D, Argos M, Arnett DK, Avery C,  
12 Barnes KC, Becker LC, Bien SA, Bis JC, Blangero J, Boerwinkle E, Bowden DW, Buyske S,  
13 Cai J, Cho MH, Choi SH, Choquet H, Adrienne Cupples L, Cushman M, Daya M, de Vries  
14 PS, Ellinor PT, Faraday N, Fornage M, Gabriel S, Ganesh SK, Graff M, Gupta N, He J,  
15 Heckbert SR, Hidalgo B, Hodonsky CJ, Irvin MR, Johnson AD, Jorgenson E, Kaplan R,  
16 Kardia SLR, Kelly TN, Kooperberg C, Lasky-Su JA, Loos RJF, Lubitz SA, Mathias RA,  
17 McHugh CP, Montgomery C, Moon JY, Morrison AC, Palmer ND, Pankratz N, Papanicolaou  
18 GJ, Peralta JM, Peyser PA, Rich SS, Rotter JI, Silverman EK, Smith JA, Smith NL, Taylor  
19 KD, Thornton TA, Tiwari HK, Tracy RP, Wang T, Weiss ST, Weng LC, Wiggins KL, Wilson  
20 JG, Yanek LR, Zöllner S, North KE, Auer PL, Raffield LM, Reiner AP, Li Y. 2019. Use of  
21 >100,000 NHLBI Trans-Omics for Precision Medicine (TOPMed) Consortium whole genome  
22 sequences improves imputation quality and detection of rare variant associations in  
23 admixed African and Hispanic/Latino populations. *PLoS Genetics* **15**:e1008500.  
24 doi:10.1371/journal.pgen.1008500

1 Lal A, Chiang ZD, Yakovenko N, Duarte FM, Israeli J, Buenrostro JD. 2021. Deep learning-based  
2 enhancement of epigenomics data with AtacWorks. *Nature Communications* **12**.  
3 doi:10.1038/s41467-021-21765-5

4 Li Y, Willer C, Sanna S, Abecasis G. 2009. Genotype Imputation. *Annual Review of Genomics*  
5 *and Human Genetics* **10**:387–406. doi:10.1146/annurev.genom.9.081307.164242

6 Lin T-Y, Goyal P, Girshick R, He K, Dollár P. 2017. Focal Loss for Dense Object Detection.

7 Liu Y, Gu J, Goyal N, Li X, Edunov S, Ghazvininejad M, Lewis M, Zettlemoyer L. 2020.  
8 Multilingual Denoising Pre-training for Neural Machine Translation. *Transactions of the*  
9 *Association for Computational Linguistics* **8**:726–742. doi:10.1162/tac1\_a\_00343

10 Marchini J, Howie B. 2010. Genotype imputation for genome-wide association studies. *Nature*  
11 *Reviews Genetics*. doi:10.1038/nrg2796

12 McCarthy S, Das S, Kretzschmar W, Delaneau O, Wood AR, Teumer A, Kang HM, Fuchsberger  
13 C, Danecek P, Sharp K, Luo Y, Sidore C, Kwong A, Timpson N, Koskinen S, Vrieze S, Scott  
14 LJ, Zhang H, Mahajan A, Veldink J, Peters U, Pato C, van Duijn CM, Gillies CE, Gandin I,  
15 Mezzavilla M, Gilly A, Cocca M, Traglia M, Angius A, Barrett JC, Boomsma D, Branham K,  
16 Breen G, Brummett CM, Busonero F, Campbell H, Chan A, Chen S, Chew E, Collins FS,  
17 Corbin LJ, Smith GD, Dedoussis G, Dorr M, Farmaki AE, Ferrucci L, Forer L, Fraser RM,  
18 Gabriel S, Levy S, Groop L, Harrison T, Hattersley A, Holmen OL, Hveem K, Kretzler M, Lee  
19 JC, McGue M, Meitinger T, Melzer D, Min JL, Mohlke KL, Vincent JB, Nauck M, Nickerson  
20 D, Palotie A, Pato M, Pirastu N, McInnis M, Richards JB, Sala C, Salomaa V, Schlessinger  
21 D, Schoenherr S, Slagboom PE, Small K, Spector T, Stambolian D, Tuke M, Tuomilehto J,  
22 van den Berg LH, van Rheenen W, Volker U, Wijmenga C, Toniolo D, Zeggini E, Gasparini  
23 P, Sampson MG, Wilson JF, Frayling T, de Bakker PIW, Swertz MA, McCarroll S,  
24 Kooperberg C, Dekker A, Altshuler D, Willer C, Iacono W, Ripatti S, Soranzo N, Walter K,  
25 Swaroop A, Cucca F, Anderson CA, Myers RM, Boehnke M, McCarthy MI, Durbin R,

- 1 Abecasis G, Marchini J. 2016. A reference panel of 64,976 haplotypes for genotype  
2 imputation. *Nature Genetics* **48**:1279–1283. doi:10.1038/ng.3643
- 3 Mou L, Norby FL, Chen LY, O’Neal WT, Lewis TT, Loehr LR, Soliman EZ, Alonso A. 2018.  
4 Lifetime Risk of Atrial Fibrillation by Race and Socioeconomic Status: ARIC Study  
5 (Atherosclerosis Risk in Communities). *Circulation: Arrhythmia and Electrophysiology* **11**.  
6 doi:10.1161/CIRCEP.118.006350
- 7 Naito T, Suzuki K, Hirata J, Kamatani Y, Matsuda K, Toda T, Okada Y. 2021. A deep learning  
8 method for HLA imputation and trans-ethnic MHC fine-mapping of type 1 diabetes. *Nature*  
9 *Communications* **12**:1–14. doi:10.1038/s41467-021-21975-x
- 10 Okewu E, Adewole P, Sennaike O. 2019. Experimental Comparison of Stochastic Optimizers in  
11 Deep LearningLecture Notes in Computer Science (Including Subseries Lecture Notes in  
12 Artificial Intelligence and Lecture Notes in Bioinformatics). Springer Verlag. pp. 704–715.  
13 doi:10.1007/978-3-030-24308-1\_55
- 14 Picard toolkit. 2019.
- 15 Rubinacci S, Delaneau O, Marchini J. 2020. Genotype imputation using the Positional Burrows  
16 Wheeler Transform. *PLOS Genetics* **16**:e1009049. doi:10.1371/journal.pgen.1009049
- 17 Sarkar E, Chielle E, Gürsoy G, Mazonka O, Gerstein M, Maniatakos M. 2021. Fast and scalable  
18 private genotype imputation using machine learning and partially homomorphic encryption.  
19 *IEEE Access*.
- 20 Sun Y v., Kardia SLR. 2008. Imputing missing genotypic data of single-nucleotide polymorphisms  
21 using neural networks. *European Journal of Human Genetics* **16**:487–495.  
22 doi:10.1038/sj.ejhg.5201988
- 23 Tian C, Fei L, Zheng W, Xu Y, Zuo W, Lin CW. 2020. Deep learning on image denoising: An  
24 overview. *Neural Networks*. doi:10.1016/j.neunet.2020.07.025

- 1 Voulodimos A, Doulamis N, Doulamis A, Protopapadakis E. 2018. Deep Learning for Computer
- 2 Vision: A Brief Review. *Computational Intelligence and Neuroscience*.
- 3 doi:10.1155/2018/7068349

4

5

# 1 Supplemental Figures

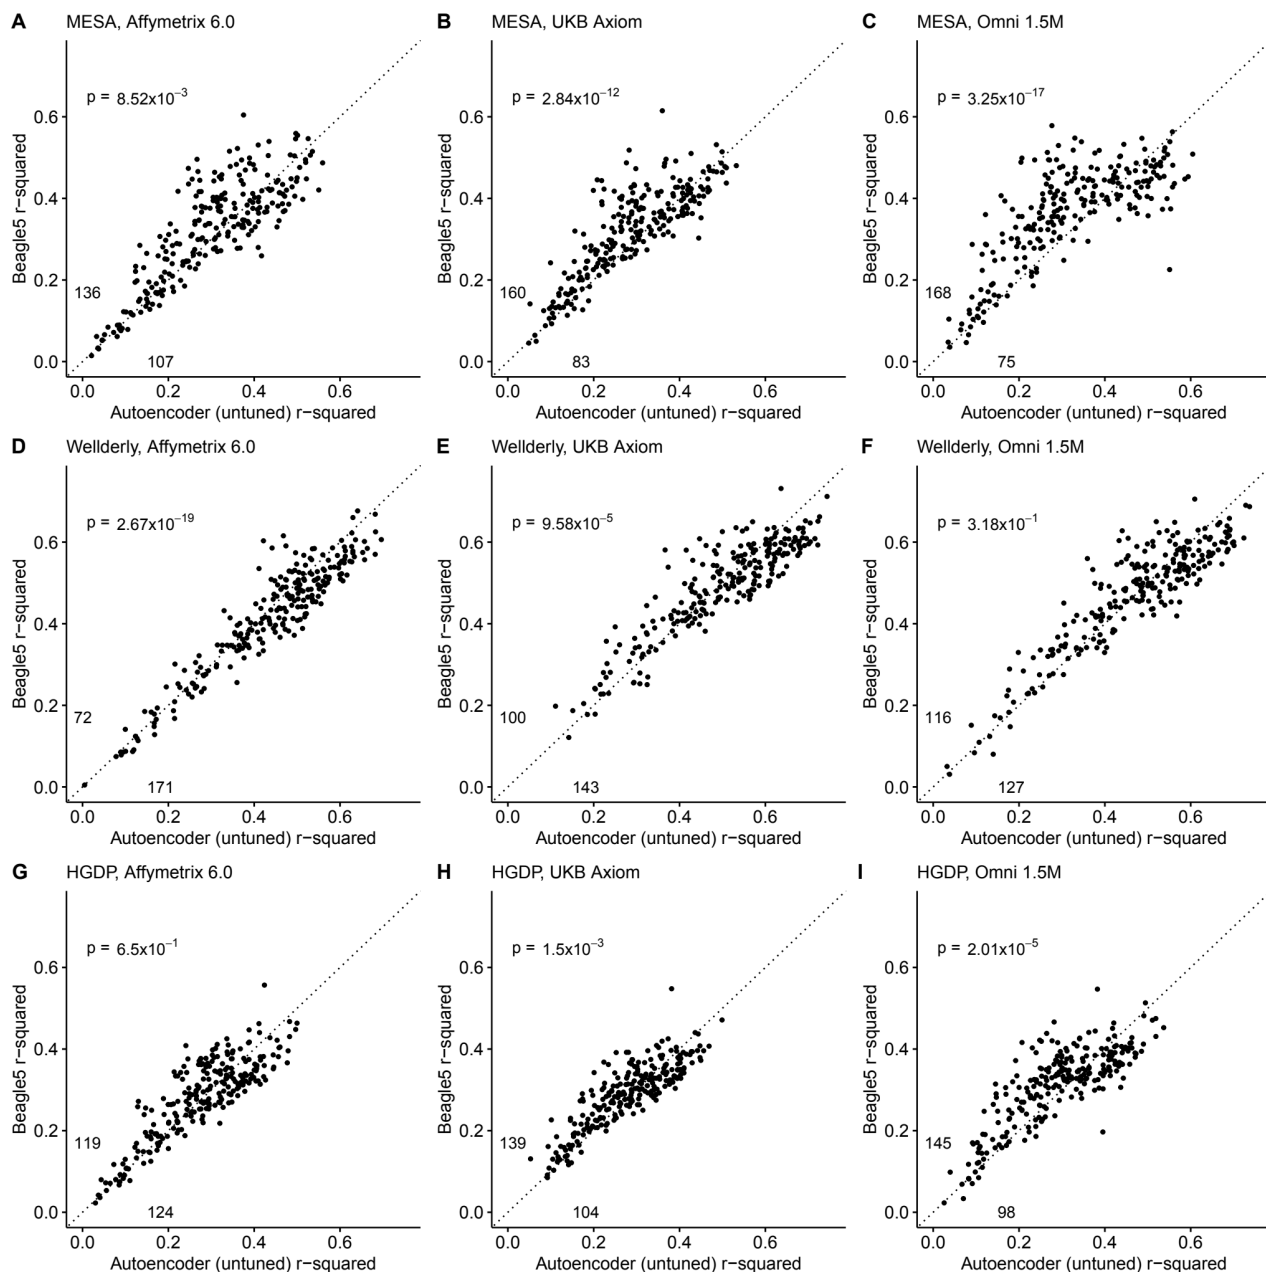

3 **Fig. S1. Beagle5 (y-axis) versus autoencoder-based (x-axis) imputation accuracy prior to**  
4 **tuning.** Beagle5 and untuned autoencoders were tested across three independent datasets -  
5 MESA (**top**), Welllderly (**middle**), and HGDP (**bottom**) - and across three genotyping array  
6 platforms - Affymetrix 6.0 (**left**), UKB Axiom (**middle**), Omni1.5M (**right**). Each data point

1 represents the imputation accuracy (average r-squared per variant) for an individual genomic  
2 segment relative to its WGS-based ground truth. The numerical values presented on the left side  
3 and below the identity line (dashed line) indicate the number of genomic segments in which  
4 Beagle5 outperformed the untuned autoencoder (left of identity line) and the number of genomic  
5 segments in which the untuned autoencoder surpassed Beagle5 (below the identity line). Statistical  
6 significance was assessed through two-proportion Z-test p-values.

7

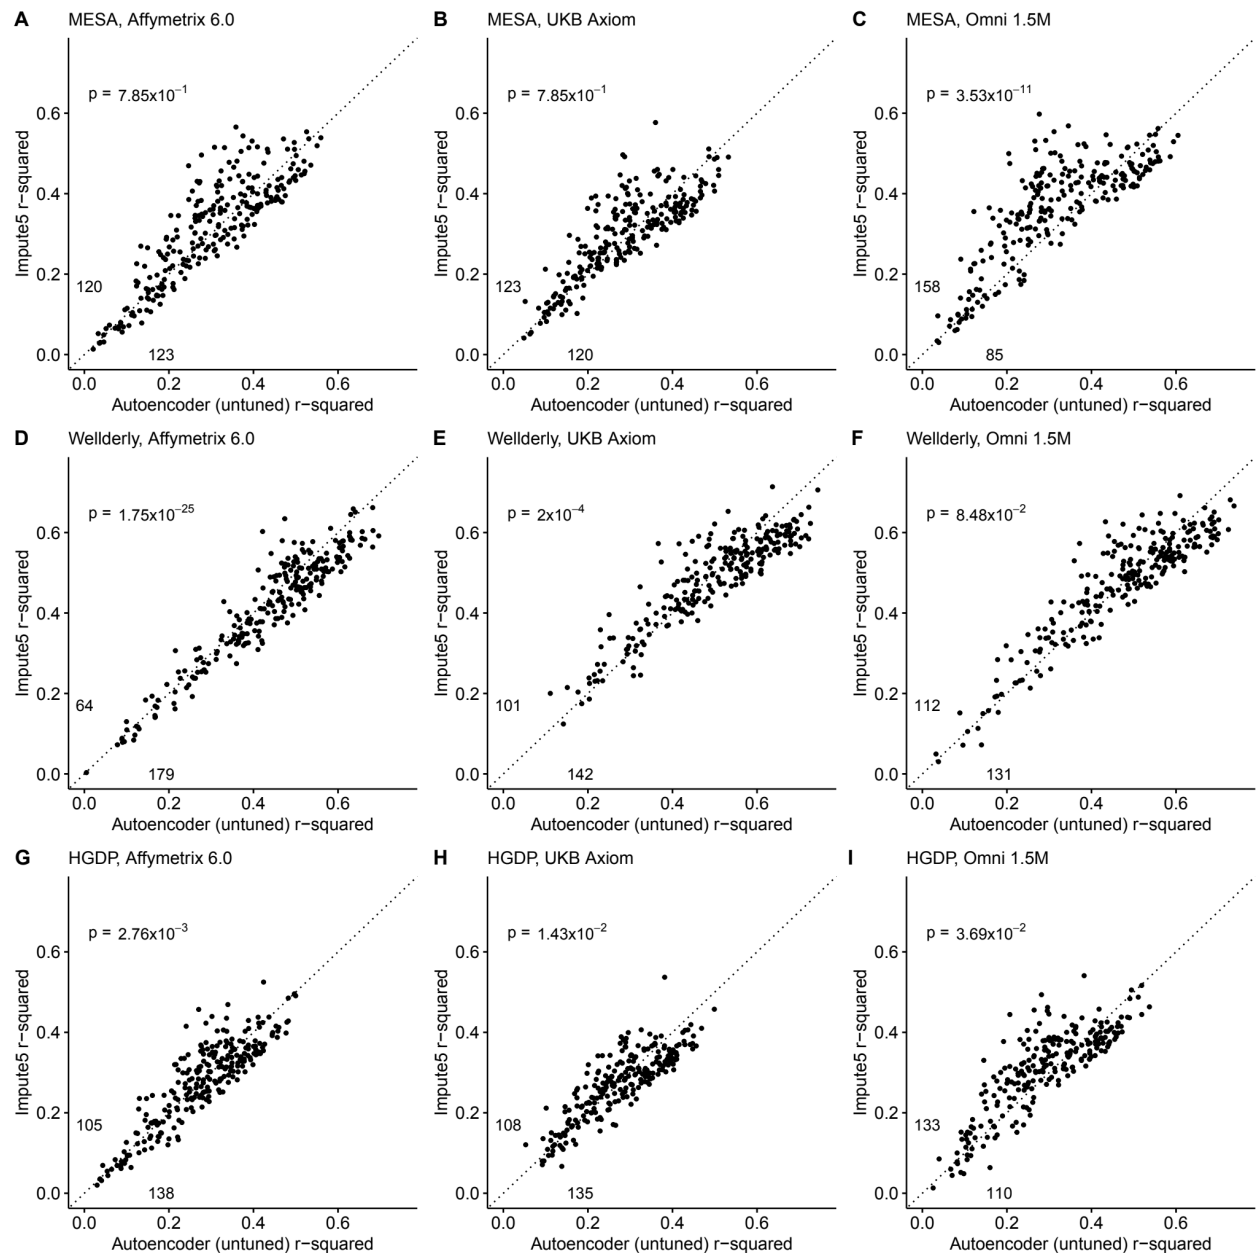

2 **Fig. S2.** Impute5 (y-axis) versus autoencoder-based (x-axis) imputation accuracy prior to tuning.  
3 Impute5 and untuned autoencoders were tested across three independent datasets - MESA (**top**),  
4 Welllderly (**middle**), and HGDP (**bottom**) - and across three genotyping array platforms - Affymetrix  
5 6.0 (**left**), UKB Axiom (**middle**), Omni1.5M (**right**). Each data point represents the imputation  
6 accuracy (average r-squared per variant) for an individual genomic segment relative to its WGS-  
7 based ground truth. The numerical values presented on the left side and below the identity line



1 (dashed line) indicate the number of genomic segments in which Impute5 outperformed the  
2 untuned autoencoder (left of identity line) and the number of genomic segments in which the  
3 untuned autoencoder surpassed Impute5 (below the identity line). Statistical significance was  
4 assessed through two-proportion Z-test p-values.

5

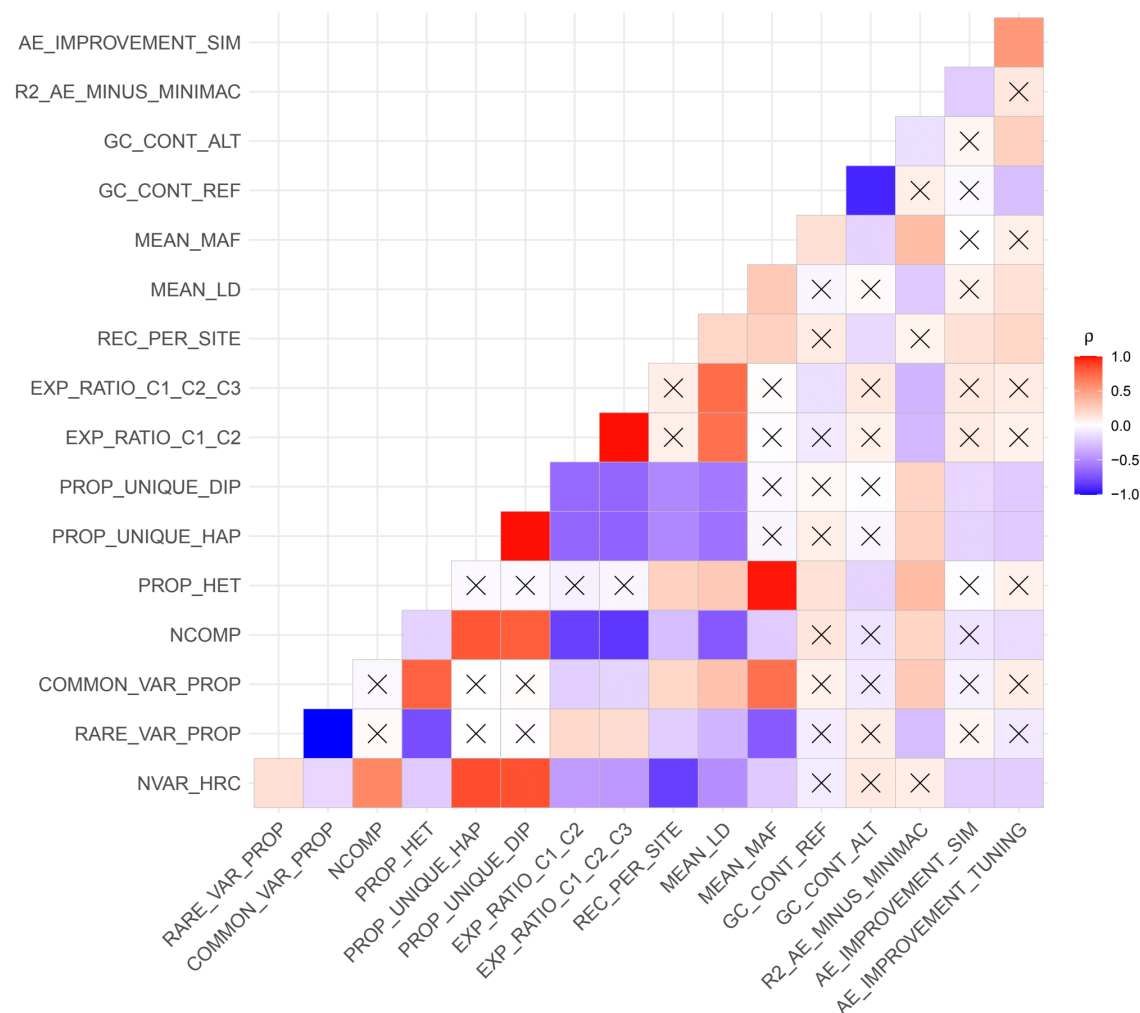

**Fig. S3. Relationship between genomic segment features and autoencoder performance.**

Spearman correlations ( $\rho$ ) between genomic segment features and autoencoder performance metrics are presented. An "X" denotes Spearman correlations that are not statistically significant ( $p > 0.05$ ). The performance metrics include the mean validation accuracy of Minimac4 and autoencoder (R2\_AE\_MINUS\_MINIMAC), the autoencoder's improvement in accuracy observed after offspring formation (AE\_IMPROVEMENT\_SIM) and the autoencoder's improvement in accuracy after fine tuning of hyperparameters (AE\_IMPROVEMENT\_TUNING). The genomic features include the total number of variants per genomic segment in HRC (NVAR\_HRC), proportion of rare variants at MAF  $\leq 0.5\%$  threshold (RARE\_VAR\_PROP), proportion of common

1 variants at MAF>0.5% threshold (COMMON\_VAR\_PROP), number of components needed to  
 2 explain at least 90% of variance after running Principal Component Analysis (NCOMP), proportion  
 3 of heterozygous genotypes (PROP\_HET), proportion of unique haplotypes (PROP\_UNIQUE\_HAP)  
 4 and diplotypes (PROP\_UNIQUE\_DIP), sum of ratios of explained variance from first two  
 5 (EXP\_RATIO\_C1\_C2) and three (EXP\_RATIO\_C1\_C2\_C3) components from Principal  
 6 Component Analysis, recombination per variant per variant (REC\_PER\_SITE), mean pairwise  
 7 correlation across all variants in each genomic segment (MEAN\_LD), mean MAF (MEAN\_MAF),  
 8 GC content of reference alleles (GC\_CONT\_REF), GC content of alternate alleles  
 9 (GC\_CONT\_ALT).

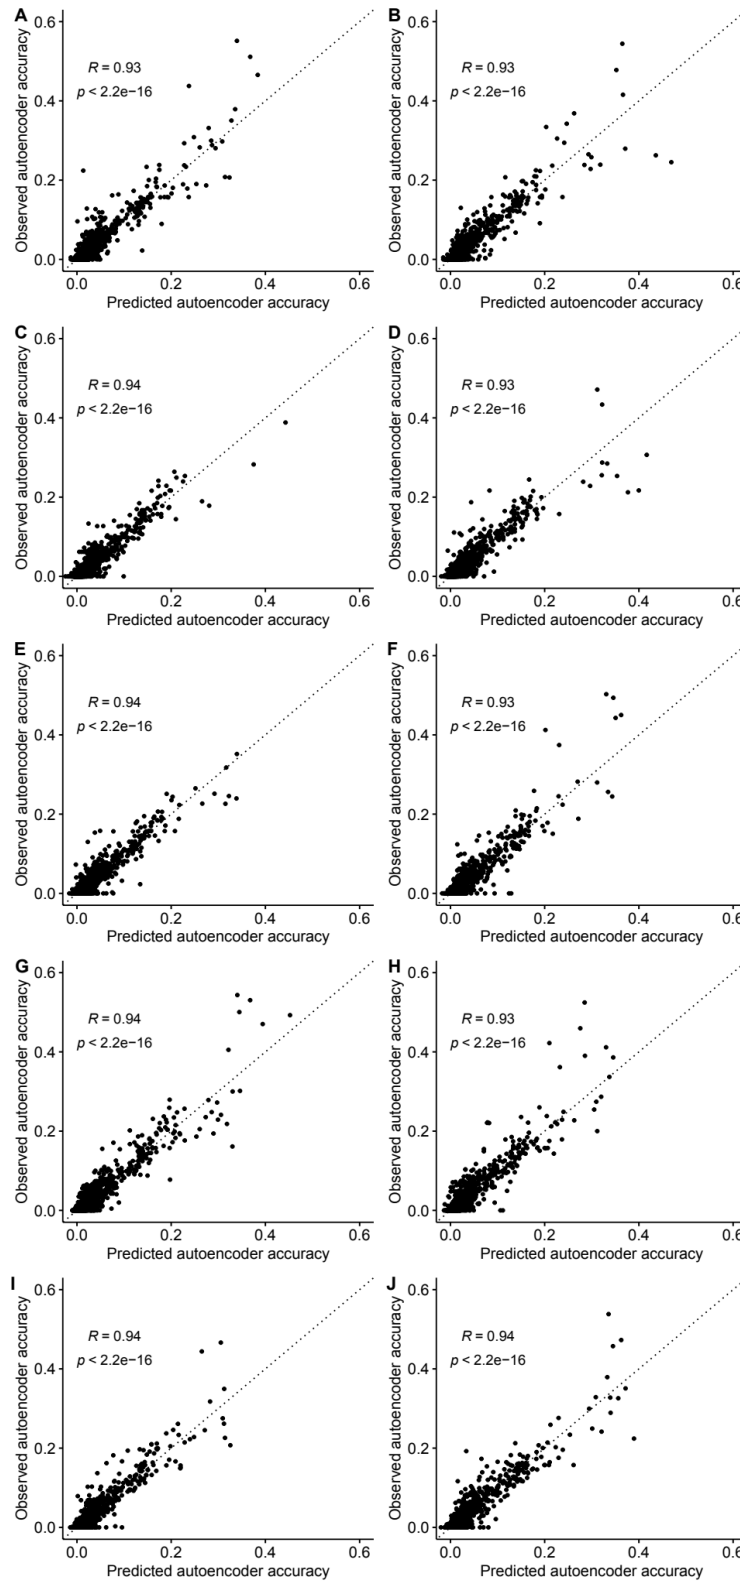

1 Fig. S4. Projecting autoencoder performance from hyperparameters and genomic features.

1 We developed an ensemble-based machine learning approach (Extreme Gradient Boosting -  
2 XGBoost) to predict the expected performance (r-squared) of each hyperparameter combination  
3 per genomic segment using the results of the coarse-grid search and predictive features calculated  
4 for each genomic segment (see Methods). We plot the observed accuracy of trained autoencoders  
5 versus the accuracy predicted by the XGBoost model after 10-fold cross-validation. Each subplot  
6 shows one iteration of the 10-fold validation process and its respective Pearson correlation between  
7 the predicted and observed accuracy values.

8

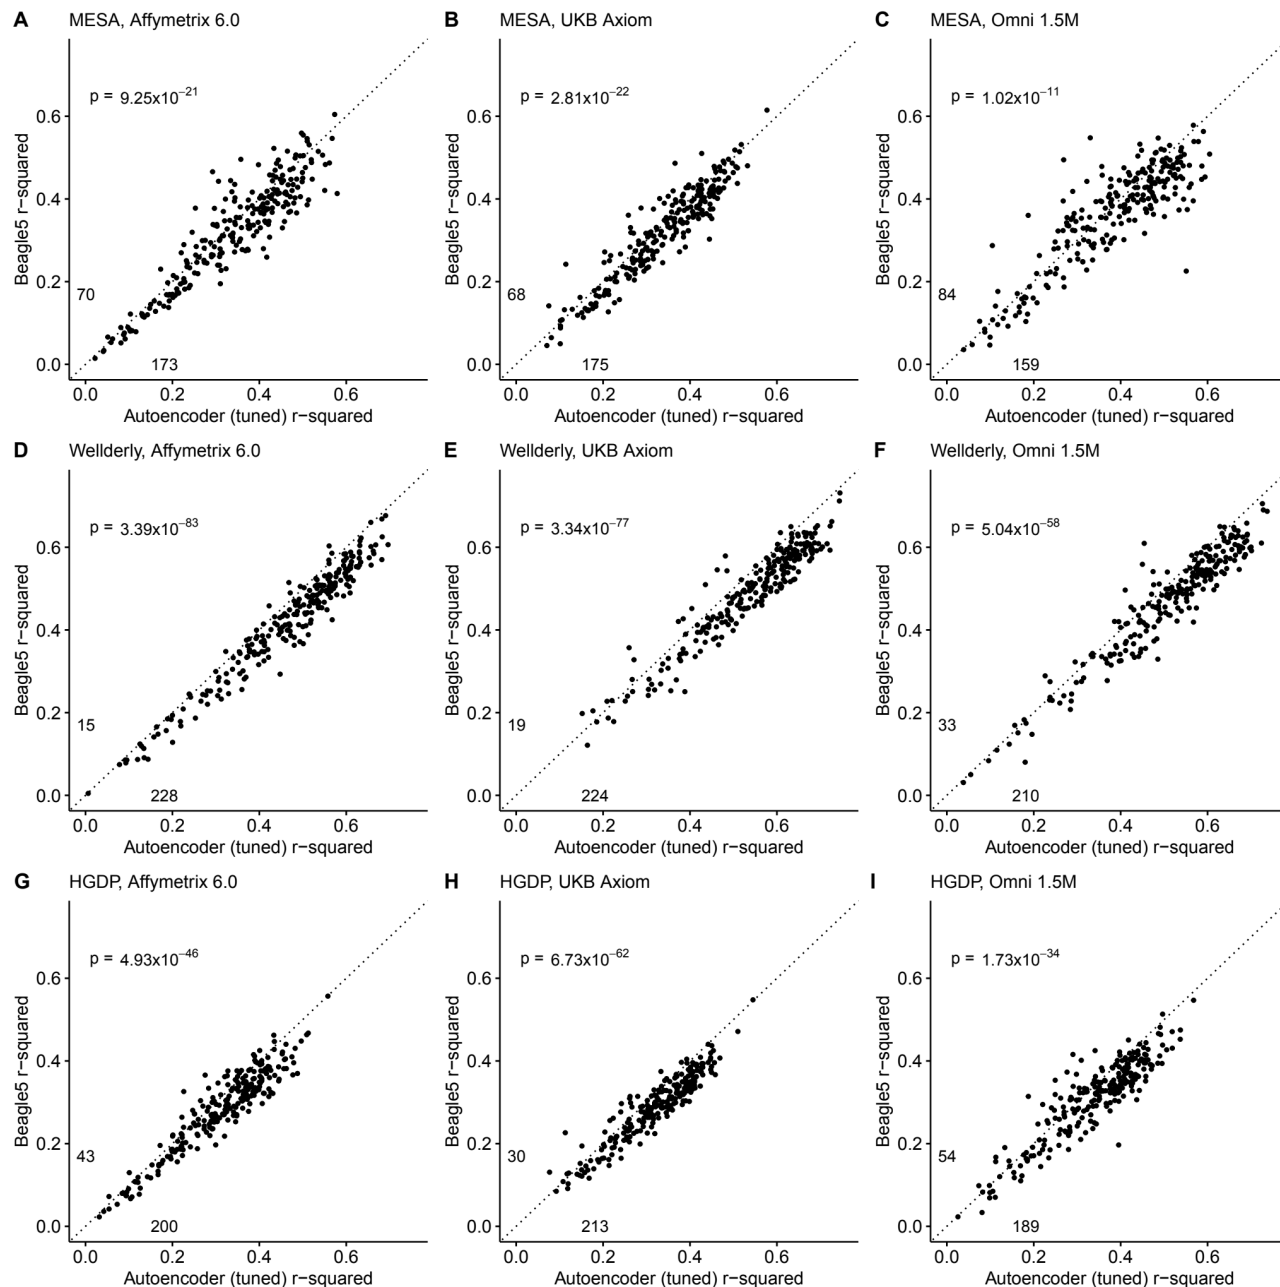

2 **Fig. S5. Beagle5 (y-axis) versus autoencoder-based (axis) imputation accuracy after tuning.**

3 Beagle5 and tuned autoencoders were validated across three independent datasets - MESA (**top**),  
4 Wellderly (**middle**), and HGDP (**bottom**) - and across three genotyping array platforms - Affymetrix  
5 6.0 (**left**), UKB Axiom (**middle**), Omni1.5M (**right**). Each data point represents the imputation  
6 accuracy (average r-squared per variant) for an individual genomic segment relative to its WGS-

1 based ground truth. The numerical values presented on the left side and below the identity line  
 2 (dashed line) indicate the number of genomic segments in which Beagle5 outperformed the  
 3 untuned autoencoder (left of identity line) and the number of genomic segments in which the  
 4 untuned autoencoder surpassed Beagle5 (below the identity line). Statistical significance was  
 5 assessed through two-proportion Z-test p-values.

6

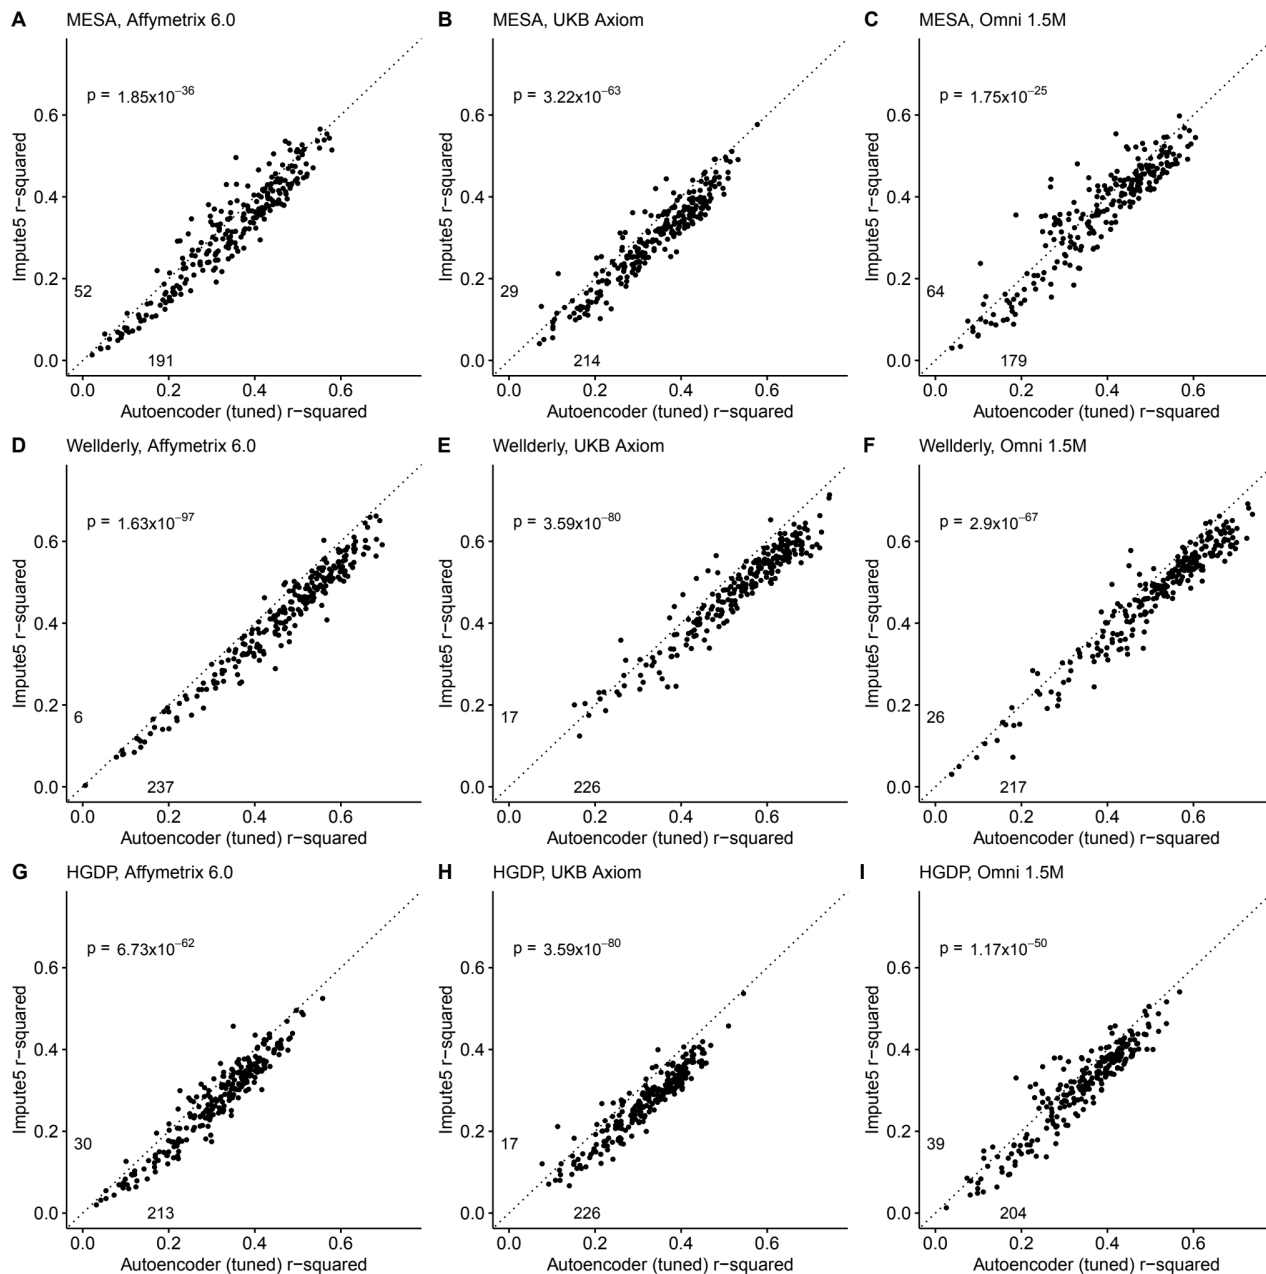

2 **Fig. S6. Impute5 (y-axis) versus autoencoder-based (axis) imputation accuracy after tuning.**

3 Impute5 and tuned autoencoders were validated across three independent datasets - MESA (**top**),  
4 Welllderly (**middle**), and HGDP (**bottom**) - and across three genotyping array platforms - Affymetrix  
5 6.0 (**left**), UKB Axiom (**middle**), Omni1.5M (**right**). Each data point represents the imputation  
6 accuracy (average r-squared per variant) for an individual genomic segment relative to its WGS-



1 based ground truth. The numerical values presented on the left side and below the identity line  
 2 (dashed line) indicate the number of genomic segments in which Impute5 outperformed the  
 3 untuned autoencoder (left of identity line) and the number of genomic segments in which the  
 4 untuned autoencoder surpassed Impute5 (below the identity line). Statistical significance was  
 5 assessed through two-proportion Z-test p-values.

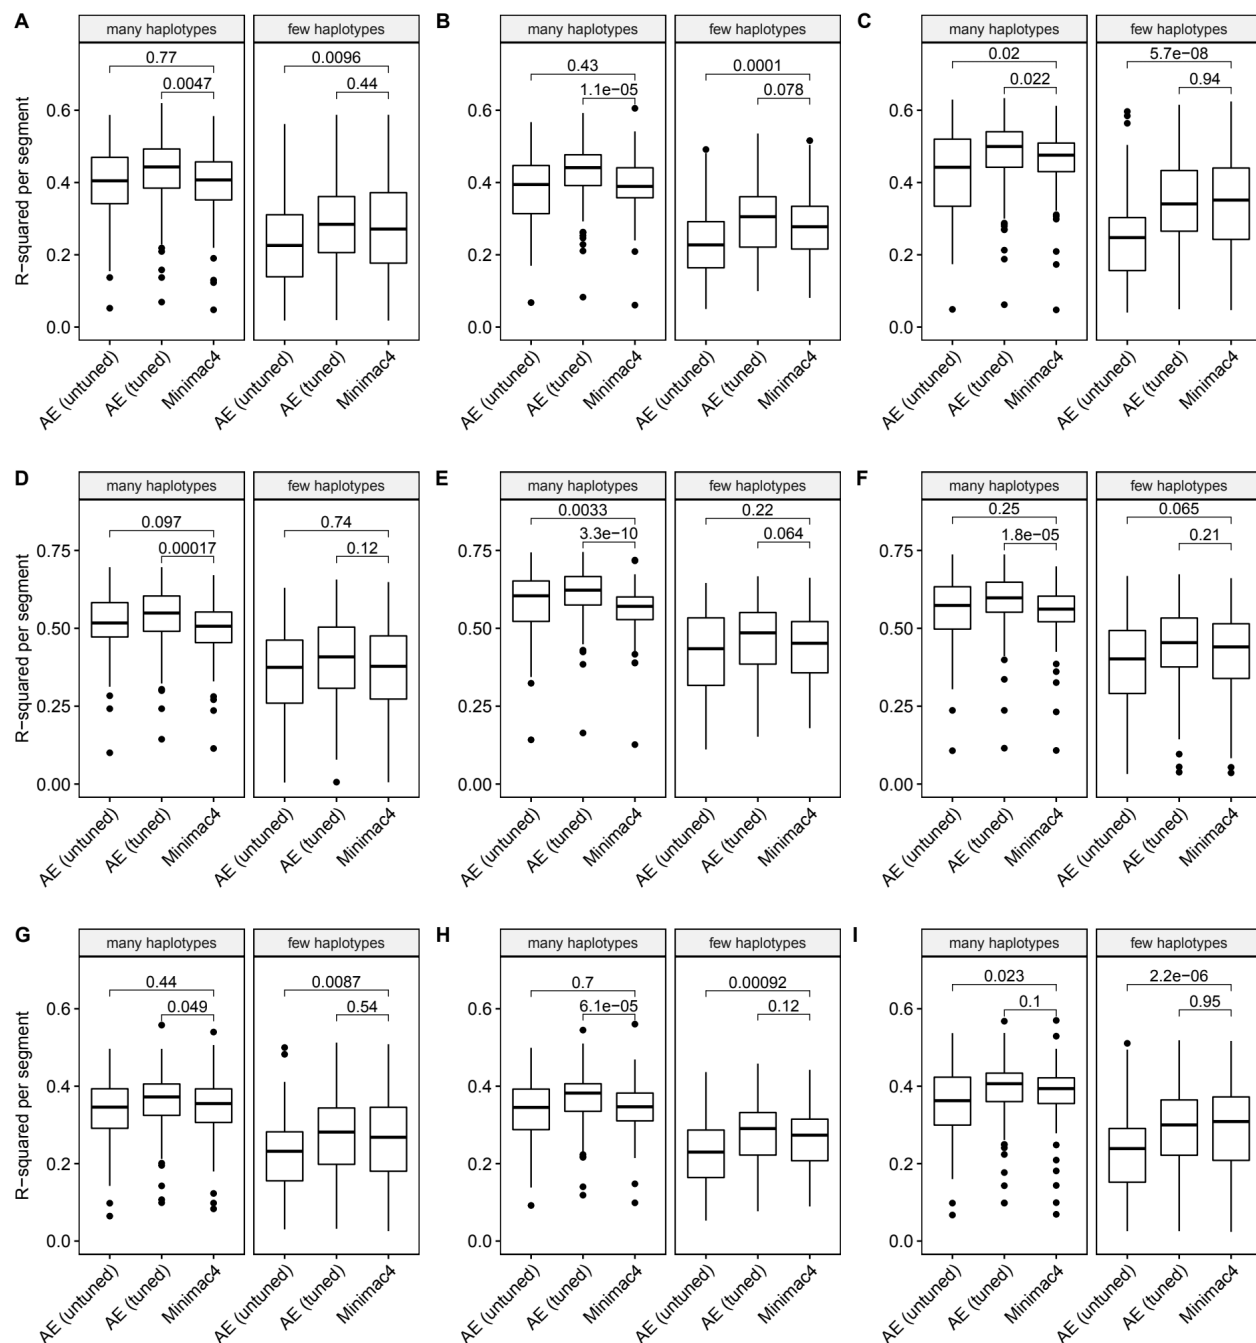

2 **Fig. S7. Imputation accuracy as a function of unique haplotype abundance.** Minimac4 and  
3 tuned and untuned autoencoders (AE) were tested across three independent datasets - MESA  
4 (**top**), Welllderly (**middle**), and HGDP (**bottom**) - and across three genotyping array platforms -  
5 Affymetrix 6.0 (**left**), UKB Axiom (**middle**), Omni1.5M (**right**). “Many” vs “Few” haplotypes are

1 defined by splitting genomic segments into those with greater than vs less than the median number  
2 of unique haplotypes per genomic segment. We applied Wilcoxon rank-sum tests to compare the  
3 untuned and tuned autoencoder to Minimac4. The validation datasets consist of: A) MESA  
4 Affymetrix 6.0; B) MESA UKB Axiom; C) MESA Omni 1.5M; D) Welllderly Affymetrix 6.0; E)  
5 Welllderly UKB Axiom; F) Welllderly Omni 1.5M; G) HGDP Affymetrix 6.0; H) HGDP UKB Axiom; I)  
6 HGDP Omni 1.5M.

7

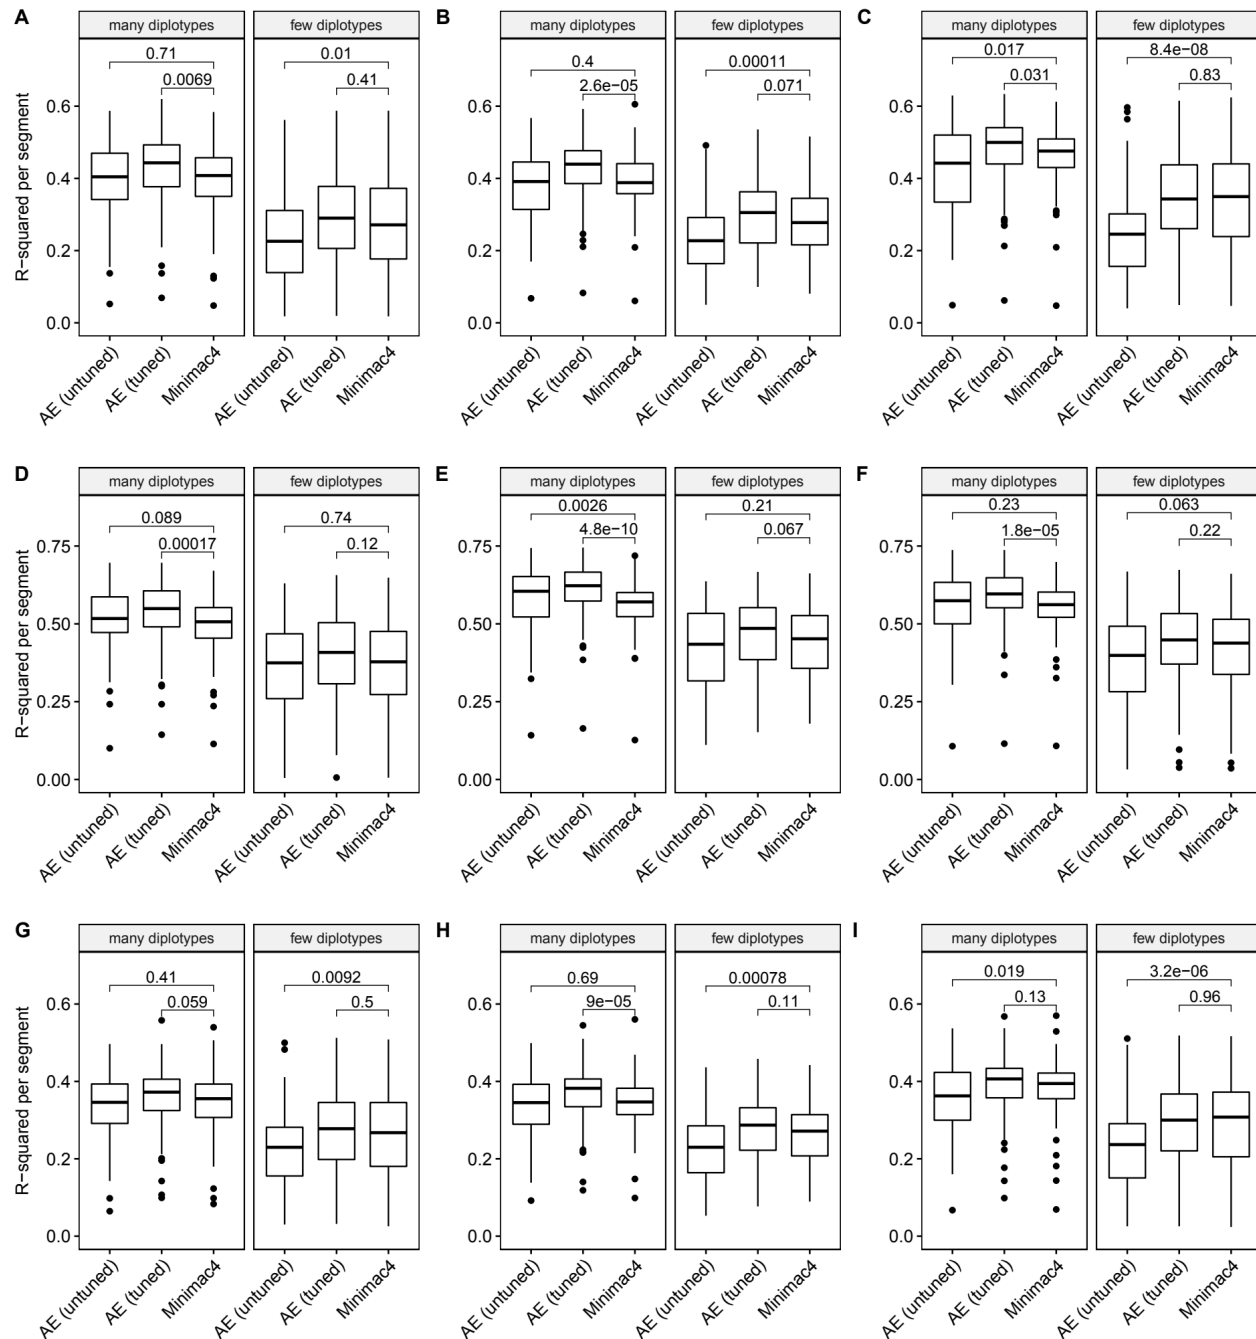

2 **Fig. S8. Imputation accuracy as a function of unique diplotype abundance.** Minimac4 and  
3 tuned and untuned autoencoders (AE) were tested across three independent datasets - MESA  
4 (**top**), Welllderly (**middle**), and HGDP (**bottom**) - and across three genotyping array platforms -  
5 Affymetrix 6.0 (**left**), UKB Axiom (**middle**), Omni1.5M (**right**). “Many” vs “Few” diplotypes are

1 defined by splitting genomic segments into those with greater than vs less than the median number  
2 of unique diplotypes per genomic segment.. We applied Wilcoxon rank-sum tests to compare the  
3 untuned and tuned autoencoder to Minimac4. The validation datasets consist of: A) MESA  
4 Affymetrix 6.0; B) MESA UKB Axiom; C) MESA Omni 1.5M; D) Welllderly Affymetrix 6.0; E)  
5 Welllderly UKB Axiom; F) Welllderly Omni 1.5M; G) HGDP Affymetrix 6.0; H) HGDP UKB Axiom; I)  
6 HGDP Omni 1.5M.

7

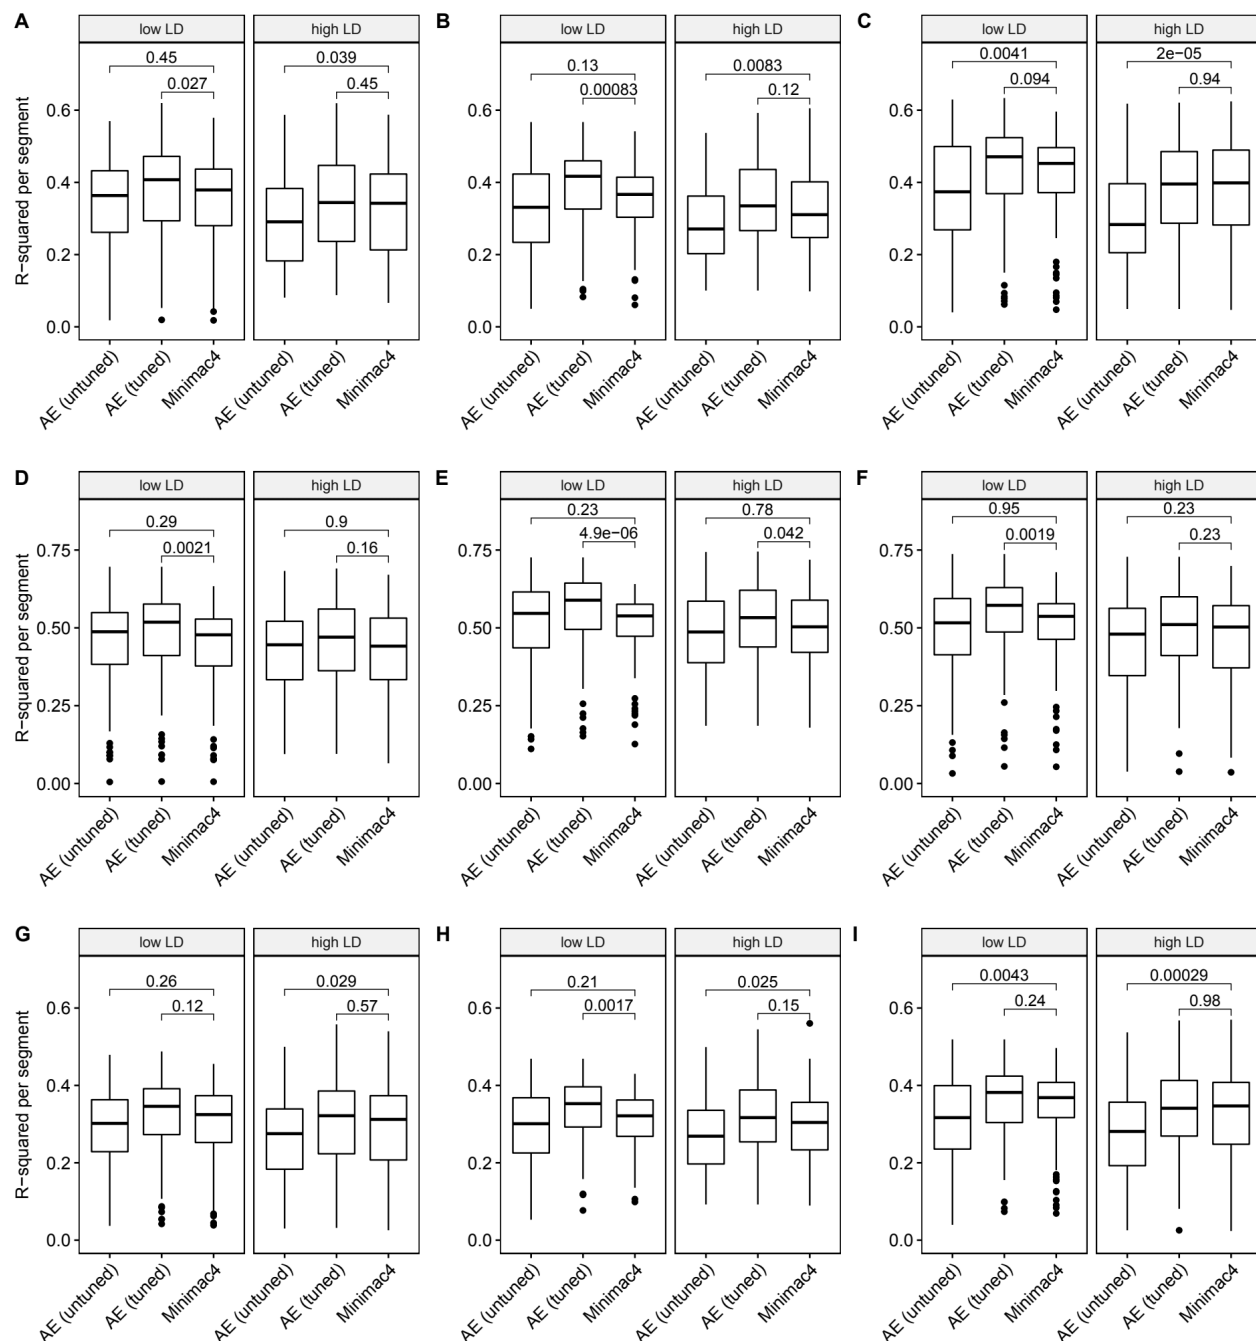

2 **Fig. S9. Imputation accuracy as a function of linkage disequilibrium (LD).** Minimac4 and tuned  
3 and untuned autoencoders (AE) were tested across three independent datasets - MESA (**top**),  
4 Welllderly (**middle**), and HGDP (**bottom**) - and across three genotyping array platforms - Affymetrix  
5 6.0 (**left**), UKB Axiom (**middle**), Omni1.5M (**right**). “High” vs “Low” LD is defined by splitting

1 genomic segments into those with greater than vs less than the average pairwise LD strength per  
2 genomic segment. We applied Wilcoxon rank-sum tests to compare the untuned and tuned  
3 autoencoder to Minimac4. The validation datasets consist of: A) MESA Affymetrix 6.0; B) MESA  
4 UKB Axiom; C) MESA Omni 1.5M; D) Welllderly Affymetrix 6.0; E) Welllderly UKB Axiom; F)  
5 Welllderly Omni 1.5M; G) HGDP Affymetrix 6.0; H) HGDP UKB Axiom; I) HGDP Omni 1.5M.

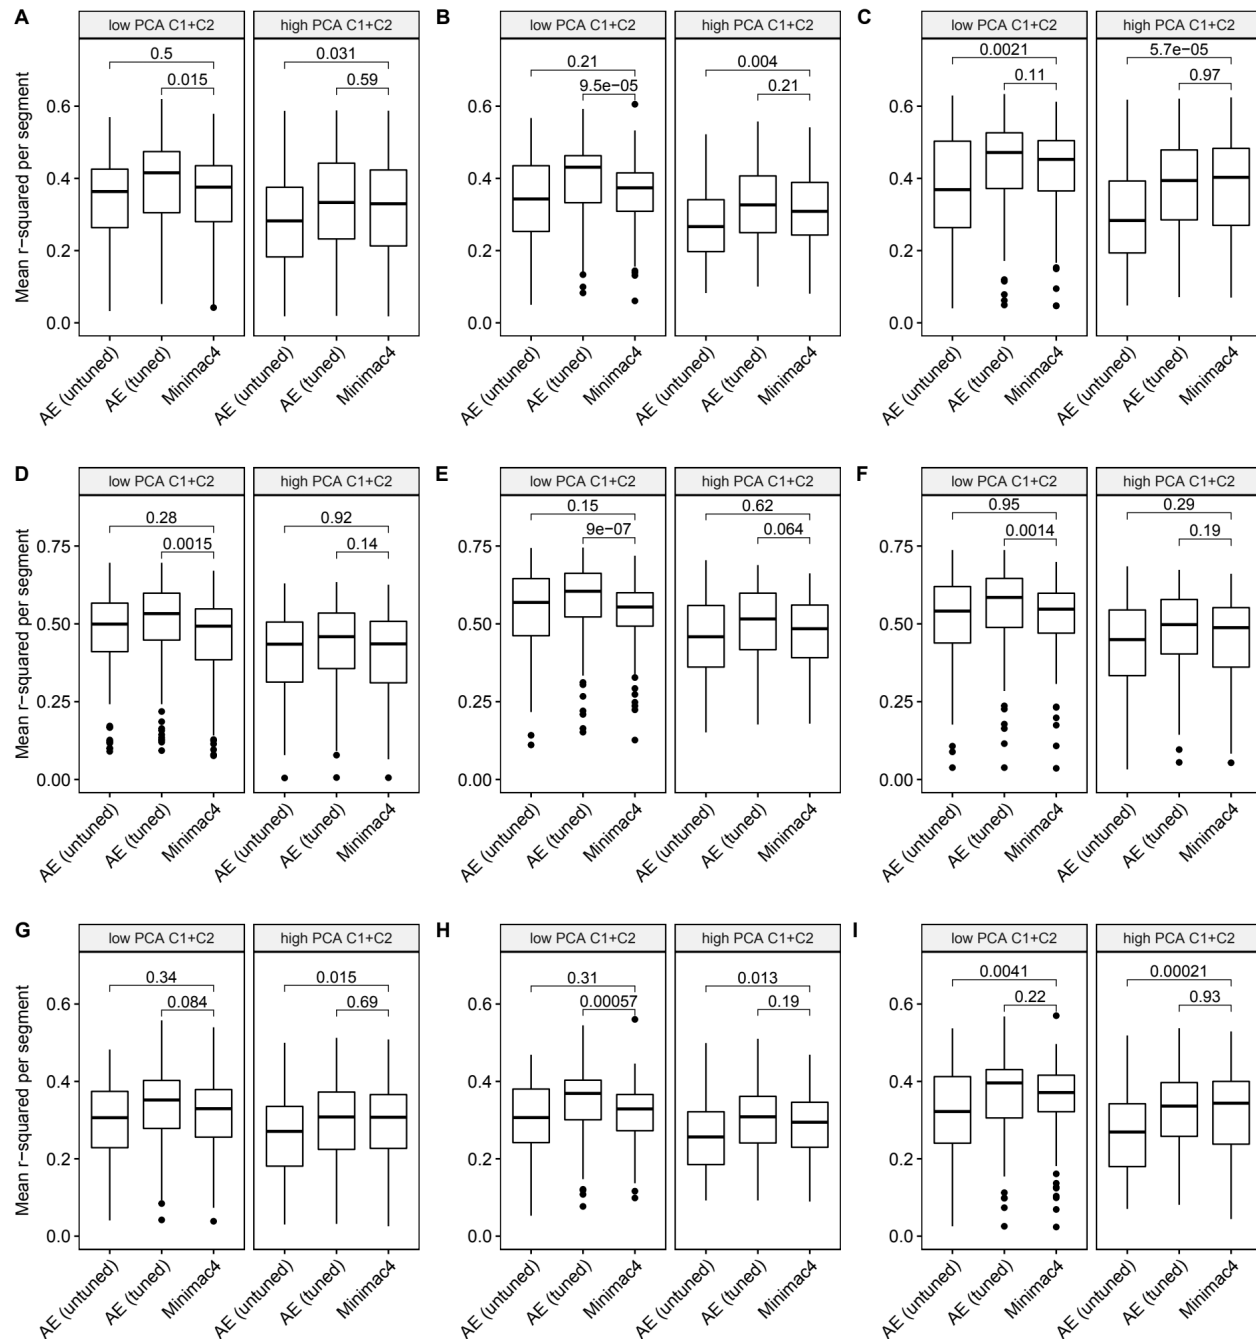

2 **Fig. S10. Imputation accuracy as a function of data complexity.** Minimac4 and tuned and  
3 untuned autoencoders (AE) were tested across three independent datasets - MESA (**top**),  
4 Welllderly (**middle**), and HGDP (**bottom**) - and across three genotyping array platforms - Affymetrix  
5 6.0 (**left**), UKB Axiom (**middle**), Omni1.5M (**right**). “High” vs “Low” data complexity is defined by



1 splitting genomic segments into those with greater than vs less than the median proportion of  
2 variance explained by first two components of Principal Component Analysis per genomic segment  
3 (PCA C1+C2). We applied Wilcoxon rank-sum tests to compare the untuned and tuned  
4 autoencoder to Minimac4. The validation datasets consist of: A) MESA Affymetrix 6.0; B) MESA  
5 UKB Axiom; C) MESA Omni 1.5M; D) Welllderly Affymetrix 6.0; E) Welllderly UKB Axiom; F)  
6 Welllderly Omni 1.5M; G) HGDP Affymetrix 6.0; H) HGDP UKB Axiom; I) HGDP Omni 1.5M.

7

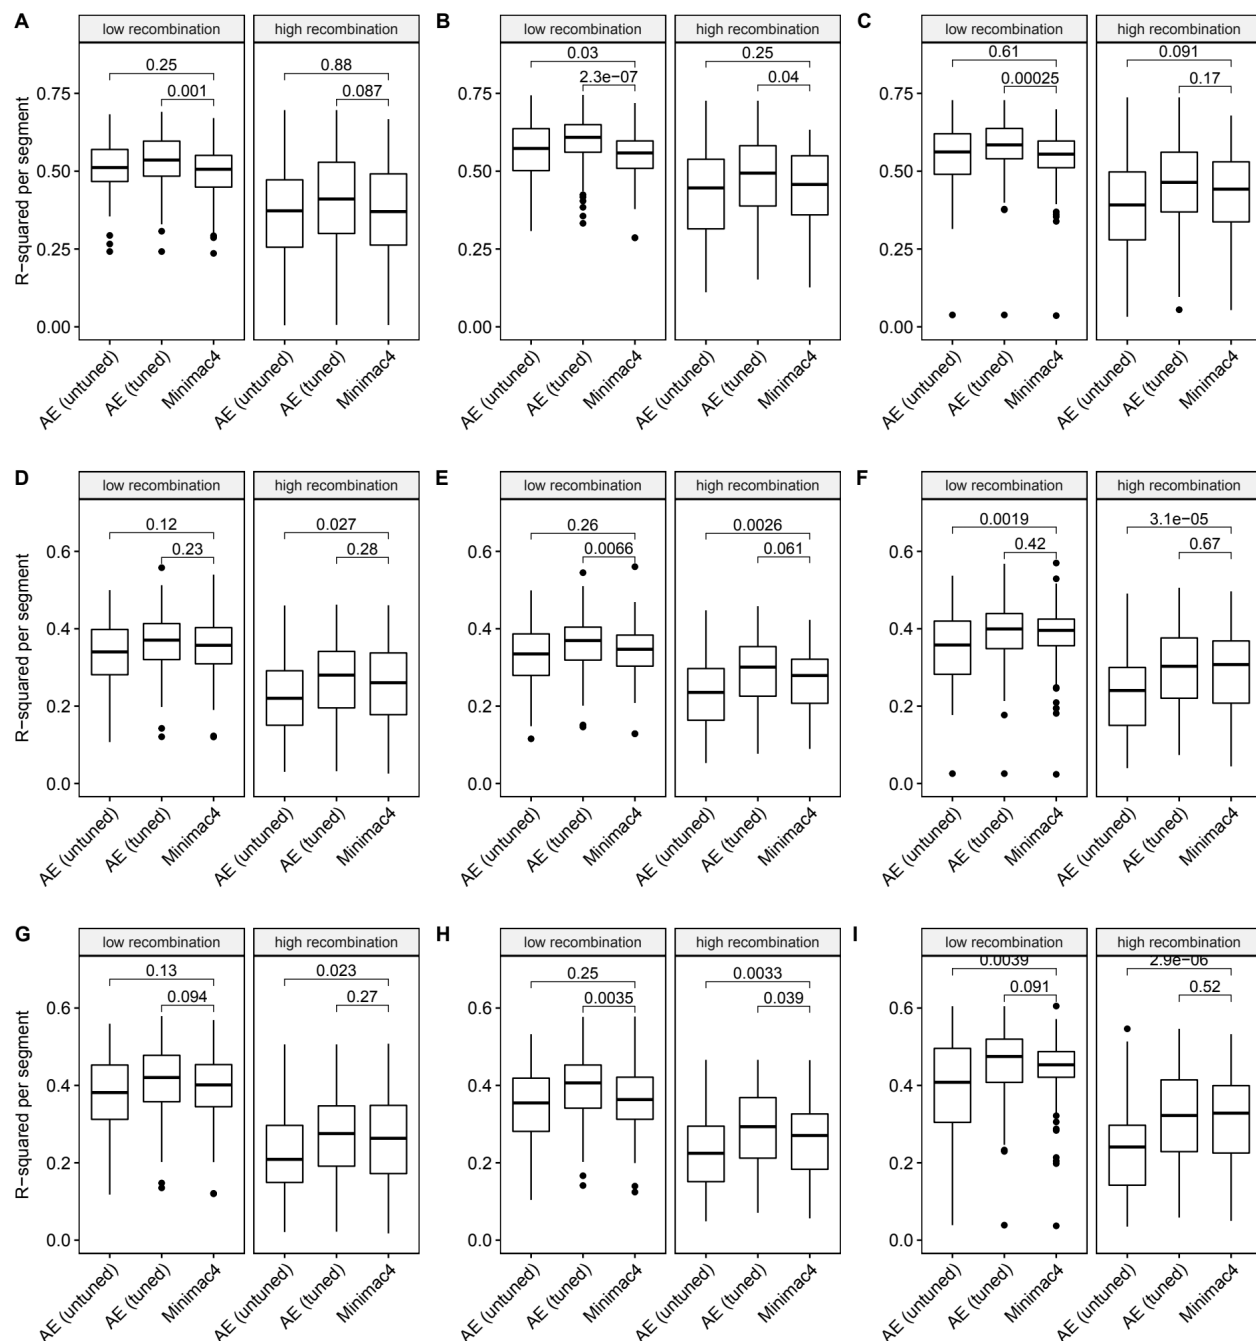

2 **Fig. S11. Imputation accuracy as a function of recombination rate.** Minimac4 and tuned and  
3 untuned autoencoders (AE) were tested across three independent datasets - MESA (**top**),  
4 Welllderly (**middle**), and HGDP (**bottom**) - and across three genotyping array platforms - Affymetrix  
5 6.0 (**left**), UKB Axiom (**middle**), Omni1.5M (**right**). “High” vs “Low” recombination rate is defined

1 by splitting genomic segments in those with greater than vs less than the median recombination  
2 rate per variant per genomic segment. We applied Wilcoxon rank-sum tests to compare the  
3 untuned and tuned autoencoder to Minimac4. The validation datasets consist of: A) MESA  
4 Affymetrix 6.0; B) MESA UKB Axiom; C) MESA Omni 1.5M; D) Welllderly Affymetrix 6.0; E)  
5 Welllderly UKB Axiom; F) Welllderly Omni 1.5M; G) HGDP Affymetrix 6.0; H) HGDP UKB Axiom; I)  
6 HGDP Omni 1.5M.

7

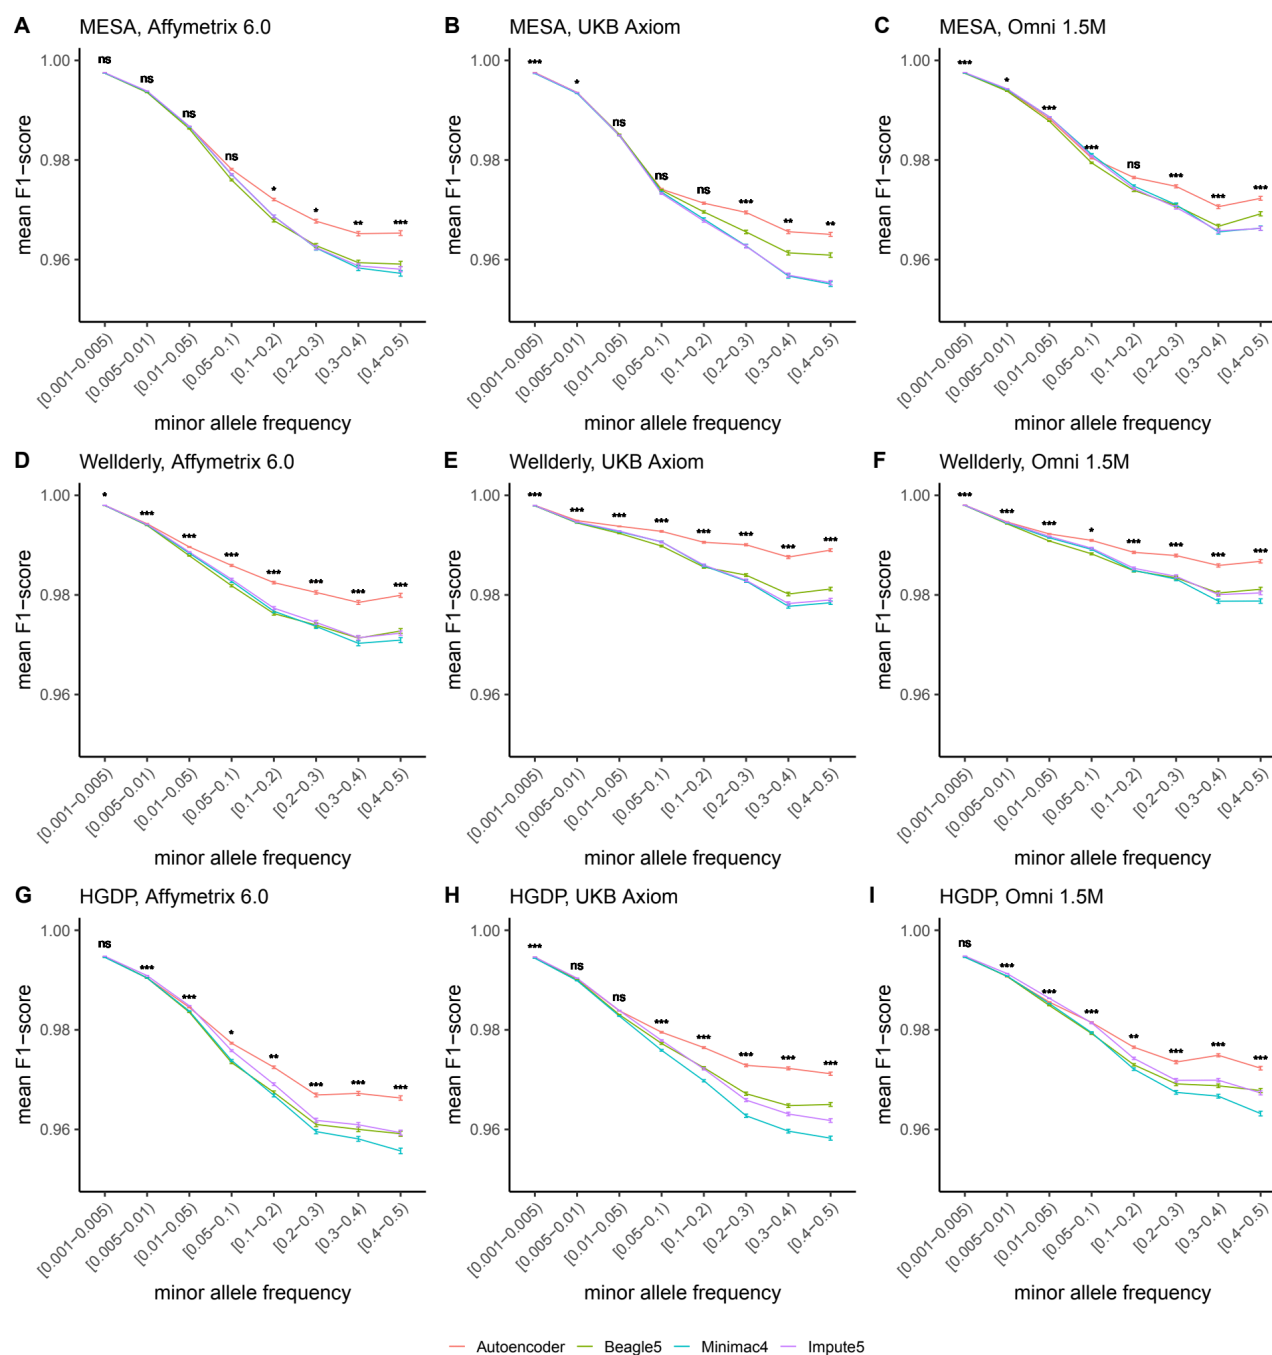

**Fig. S12. HMM-based versus autoencoder-based imputation accuracy across MAF bins (F1 score).** Autoencoder-based (red) and HMM-based (Minimac4 (blue), Beagle5 (green), and Impute5 (purple)) imputation accuracy was validated across three independent datasets - MESA (top), Wellderly (middle), and HGDP (bottom) - and across three genotyping array platforms -

1 Affymetrix 6.0 (**left**), UKB Axiom (**middle**), Omni1.5M (**right**). Each data point represents the  
 2 imputation accuracy (mean F1-score per variant) relative to WGS-based ground truth across MAF  
 3 bins. Error bars represent standard errors. We applied Wilcoxon rank-sum tests to compare the  
 4 HMM-based tools to the tuned autoencoder (AE). \* represents p-values  $\leq 0.05$ , \*\* indicates p-  
 5 values  $\leq 0.001$ , and \*\*\* indicates p-values  $\leq 0.0001$ , ns represents non-significant p-values.

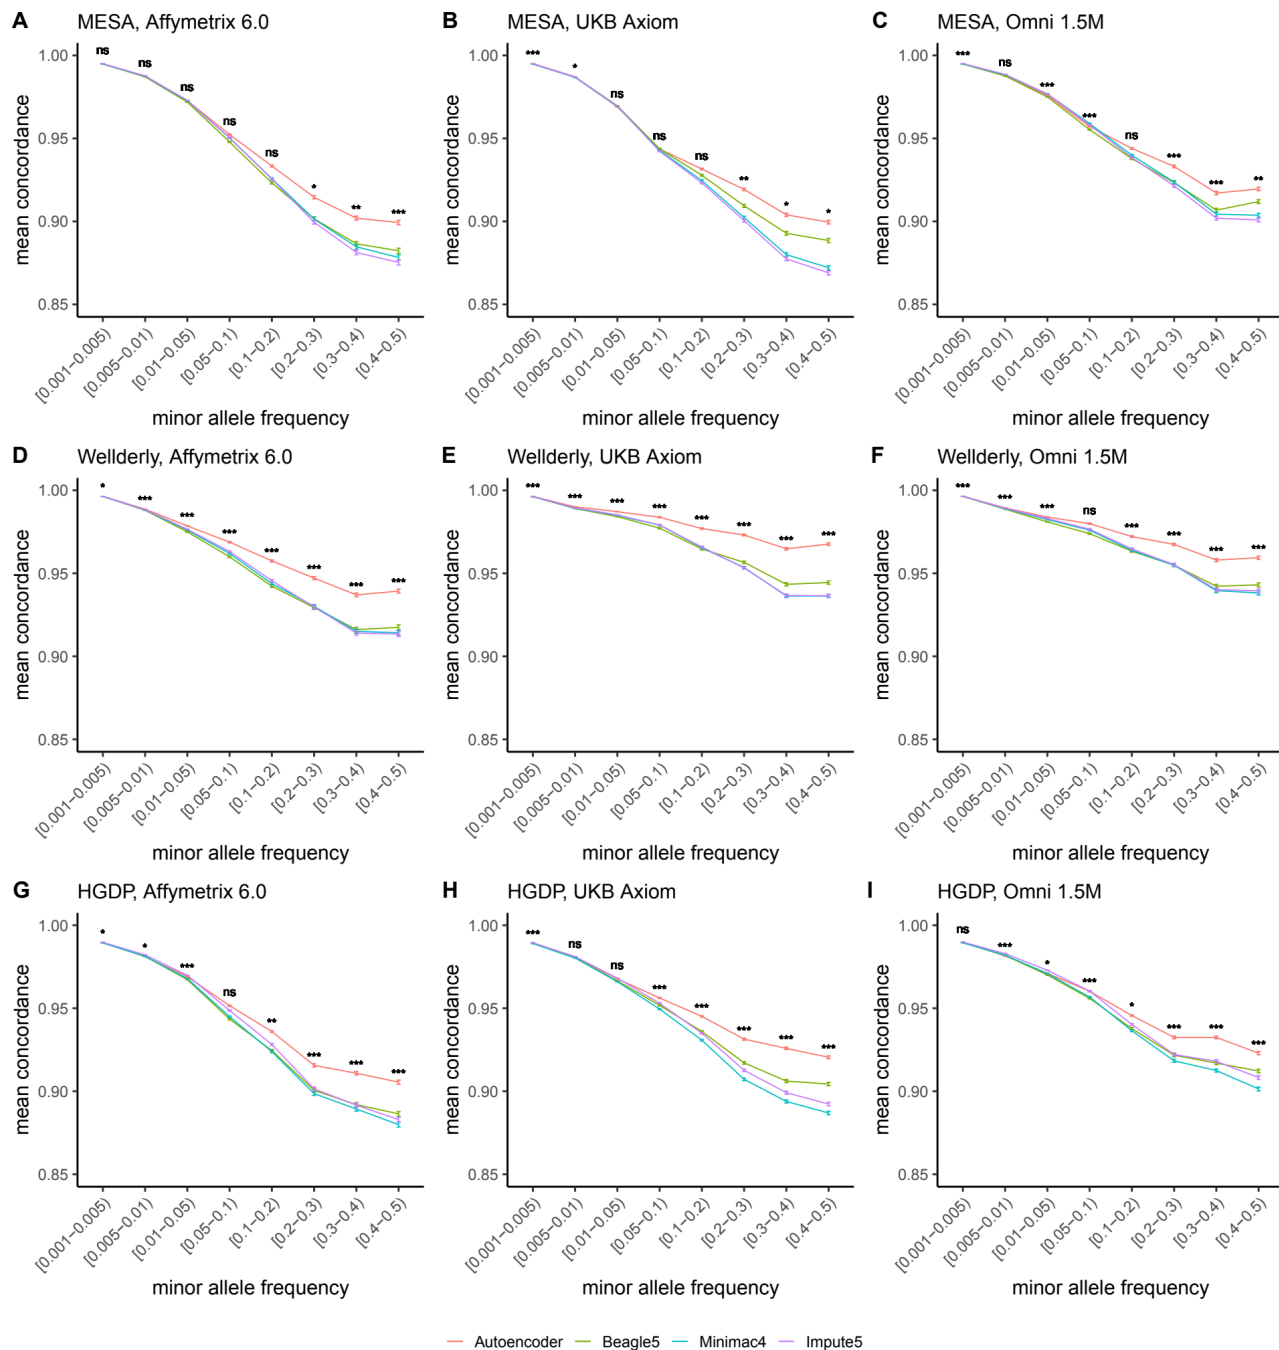

**Fig. S13. HMM-based versus autoencoder-based imputation accuracy across MAF bins (concordance).** Autoencoder-based (red) and HMM-based (Minimac4 (blue), Beagle5 (green), and Impute5 (purple)) imputation accuracy was validated across three independent datasets - MESA (top), Wellderly (middle), and HGDP (bottom) - and across three genotyping array

1 platforms - Affymetrix 6.0 (**left**), UKB Axiom (**middle**), Omni1.5M (**right**). Each data point  
 2 represents the imputation accuracy (mean concordance per variant) relative to WGS-based ground  
 3 truth across MAF bins. Error bars represent standard errors. We applied Wilcoxon rank-sum tests  
 4 to compare the HMM-based tools to the tuned autoencoder (AE). \* represents p-values  $\leq 0.05$ , \*\*  
 5 indicates p-values  $\leq 0.001$ , and \*\*\* indicates p-values  $\leq 0.0001$ , ns represents non-significant p-  
 6 values.

7

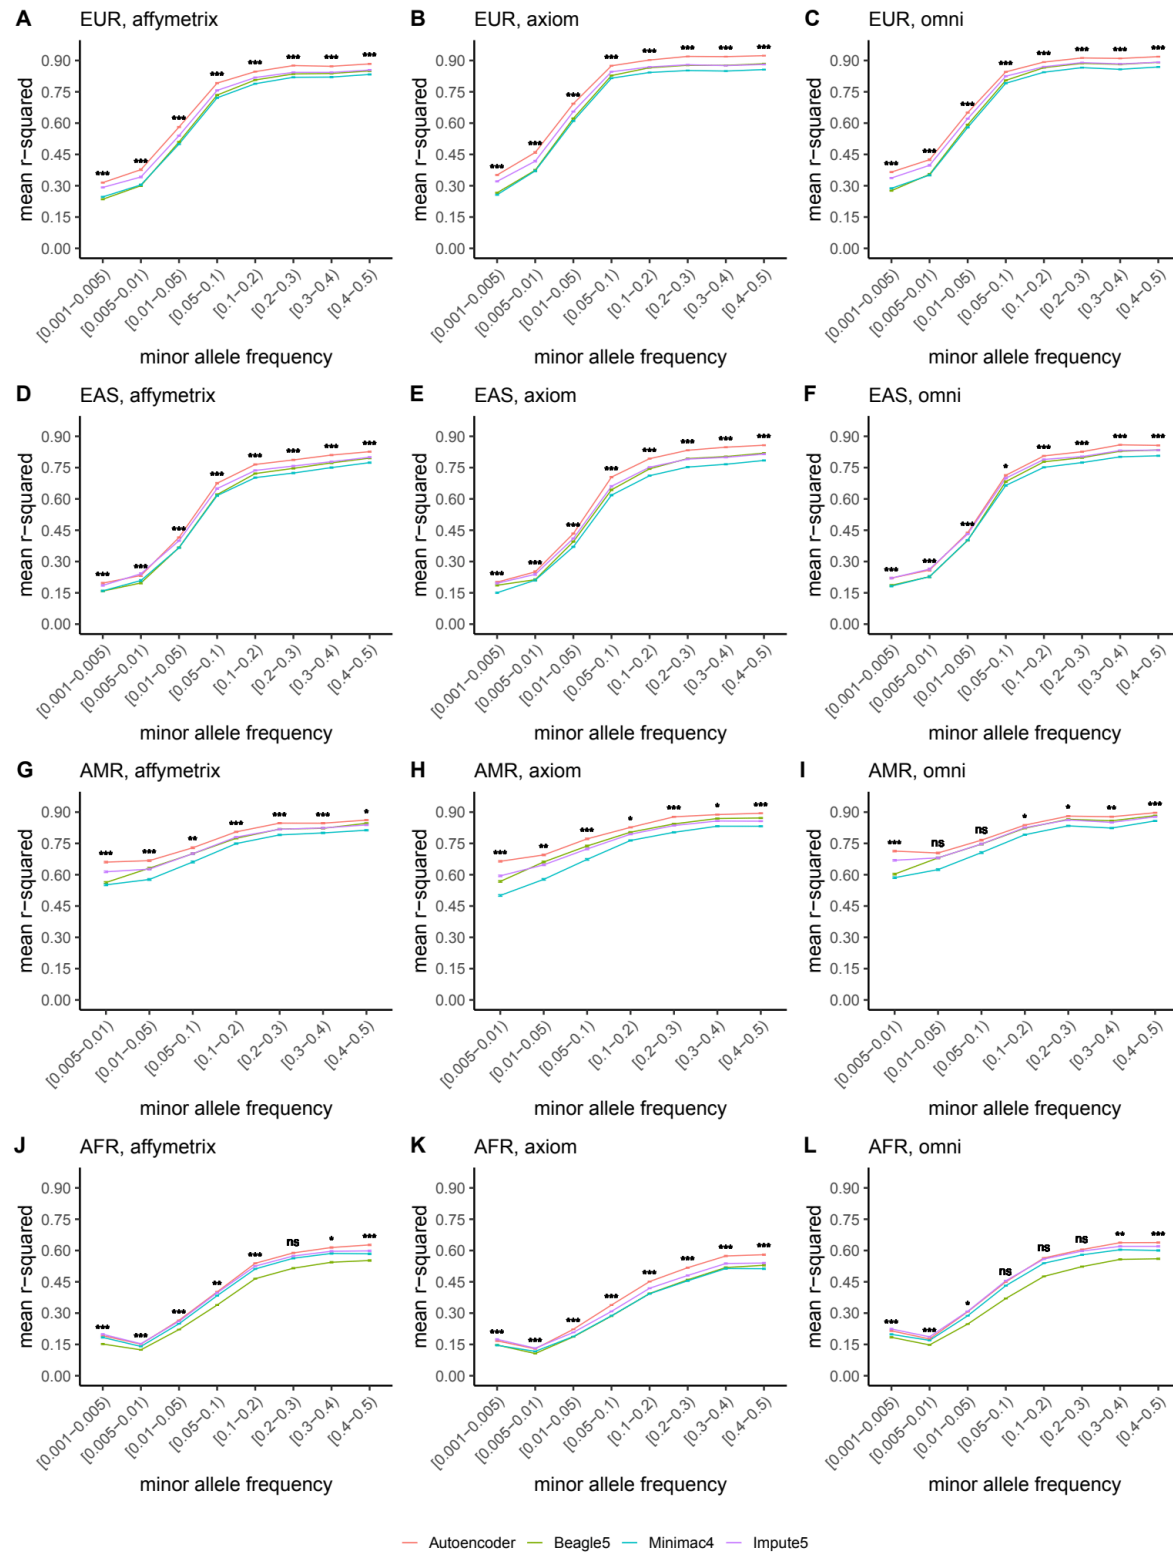



1 **Fig. S14. HMM-based versus autoencoder-based imputation accuracy across ancestry**  
2 **groups.** Autoencoder-based (**red**) and HMM-based (Minimac4 (**blue**), Beagle5 (**green**), and  
3 Impute5 (**purple**)) imputation accuracy was validated across individuals of diverse ancestry from  
4 HGP cohort (EUR: European (**top**); EAS: East Asian (**2<sup>nd</sup> row**); AMR: Native American (**3<sup>rd</sup> row**);  
5 AFR: African (**bottom**)) and multiple genotype array platforms (Affymetrix 6.0 (**left**), UKB Axiom  
6 (**middle**), Omni1.5M (**right**)). Each data point represents the imputation accuracy (average  $r^2$   
7 squared per variant) relative to WGS-based ground truth across MAF bins. Error bars represent  
8 standard errors. We applied Wilcoxon rank-sum tests to compare the HMM-based tools to the tuned  
9 autoencoder (AE). \* represents  $p$ -values  $\leq 0.05$ , \*\* indicates  $p$ -values  $\leq 0.001$ , and \*\*\* indicates  $p$ -  
10 values  $\leq 0.0001$ , ns represents non-significant  $p$ -values.

11

# Supplemental Tables

2

3 **Table S1.** Performance comparisons between tuned autoencoder (AE) and HMM-based  
4 imputation tools (Minimac4, Beagle5, and Impute5) after applying data augmentation to HMM-  
5 based tools.

|                                           | MESA        | Welllderly  | HGDP        | Affymetrix 6.0 | UKB Axiom   | Omni 1.5M   | Combined    |
|-------------------------------------------|-------------|-------------|-------------|----------------|-------------|-------------|-------------|
| <b>AE (tuned) vs Minimac4 (augmented)</b> | 1.36e-04*   | 3.49e-06*   | 1.18e-03*   | 6.05e-04*      | 6.98e-08*   | 1.95e-03*   | 3.39e-05*   |
| <b>AE (tuned) vs Beagle5 (augmented)</b>  | 1.71e-05*   | 1.68e-09*   | 2.88e-09*   | 1.54e-06*      | 3.94e-10*   | 4.30e-07*   | 2.30e-08*   |
| <b>AE (tuned) vs Impute5 (augmented)</b>  | 1.24e-09*   | 3.15e-15*   | 5.28e-15*   | 4.41e-11*      | 2.47e-18*   | 4.90e-10*   | 8.64e-14*   |
| <b>Minimac4 (original vs augmented)</b>   | 4.91e-02*   | 2.07E-01    | 1.03E-01    | 1.74E-01       | 4.36e-02*   | 1.13E-01    | 9.17E-02    |
| <b>Beagle5 (original vs augmented)</b>    | 1.21e-02*   | 8.21E-02    | 2.35e-02*   | 8.96E-02       | 6.59e-03*   | 5.27E-02    | 2.58e-02*   |
| <b>Impute5 (original vs augmented)</b>    | 5.45e-04*   | 6.89e-05*   | 1.78e-04*   | 7.01e-04*      | 1.16e-05*   | 4.15e-04*   | 1.26e-04*   |
| <b>AE (tuned)</b>                         | 0.355±0.007 | 0.505±0.008 | 0.327±0.006 | 0.373±0.008    | 0.399±0.007 | 0.414±0.008 | 0.396±0.007 |
| <b>Minimac4 (augmented)</b>               | 0.322±0.007 | 0.462±0.008 | 0.303±0.006 | 0.342±0.008    | 0.358±0.006 | 0.388±0.007 | 0.363±0.007 |
| <b>Beagle5 (augmented)</b>                | 0.316±0.007 | 0.446±0.008 | 0.283±0.005 | 0.327±0.007    | 0.348±0.006 | 0.370±0.007 | 0.349±0.006 |
| <b>Impute5 (augmented)</b>                | 0.294±0.007 | 0.416±0.008 | 0.261±0.006 | 0.302±0.008    | 0.318±0.006 | 0.351±0.008 | 0.324±0.007 |

6 We applied Wilcoxon rank-sum tests to compare the HMM-based tools to the reference tuned  
7 autoencoder (AE). \* represents p-values  $\leq 0.05$ , \*\* indicates p-values  $\leq 0.001$ , and \*\*\* indicates p-  
8 values  $\leq 0.0001$ .

1 **Table S2.** Detailed performance comparisons between tuned autoencoder (AE) and HMM-based  
2 imputation tools (Minimac4, Beagle5, and Impute5).

| Dataset                       | MESA           |             |              | Welllderly     |             |              | HGDP           |              |              |
|-------------------------------|----------------|-------------|--------------|----------------|-------------|--------------|----------------|--------------|--------------|
| array                         | Affymetrix 6.0 | UKB Axiom   | Omni 1.5M    | Affymetrix 6.0 | UKB Axiom   | Omni 1.5M    | Affymetrix 6.0 | UKB Axiom    | Omni 1.5M    |
| <b>AE (tuned) vs Minimac4</b> | 9.47e-185***   | 0.00e+00*** | 7.22e-89***  | 6.27e-209***   | 0.00e+00*** | 2.75e-198*** | 2.35e-151***   | 0.00e+00***  | 5.55e-67***  |
| <b>AE (tuned) vs Beagle5</b>  | 0.00e+00***    | 0.00e+00*** | 0.00e+00***  | 0.00e+00***    | 0.00e+00*** | 0.00e+00***  | 0.00e+00***    | 0.00e+00***  | 0.00e+00***  |
| <b>AE (tuned) vs Impute5</b>  | 0.00e+00***    | 0.00e+00*** | 5.37e-191*** | 0.00e+00***    | 0.00e+00*** | 0.00e+00***  | 0.00e+00***    | 0.00e+00***  | 0.00e+00***  |
| <b>Minimac4 vs Beagle5</b>    | 1.73e-259***   | 6.06e-16*** | 0.00e+00***  | 2.68e-86***    | 1.65e-11*** | 6.87e-64***  | 0.00e+00***    | 2.62e-185*** | 0.00e+00***  |
| <b>Minimac4 vs Impute5</b>    | 4.87e-38***    | 3.59e-48*** | 1.17e-22***  | 3.05e-74***    | 5.94e-15*** | 1.00e-25***  | 9.43e-261***   | 0.00e+00***  | 1.73e-251*** |
| <b>Beagle5 vs Impute5</b>     | 1.92e-96***    | 2.75e-09*** | 1.23e-175*** | 3.65E-01       | 1.98E-01    | 9.53e-09***  | 1.22e-25***    | 2.61e-17***  | 8.36e-57***  |
| <b>AE (tuned)</b>             | 0.410±0.001    | 0.395±0.001 | 0.452±0.001  | 0.537±0.001    | 0.605±0.001 | 0.586±0.001  | 0.363±0.001    | 0.364±0.001  | 0.392±0.001  |
| <b>Minimac4</b>               | 0.390±0.001    | 0.364±0.001 | 0.436±0.001  | 0.500±0.001    | 0.557±0.001 | 0.551±0.001  | 0.350±0.001    | 0.340±0.001  | 0.385±0.001  |
| <b>Beagle5</b>                | 0.383±0.001    | 0.379±0.001 | 0.420±0.001  | 0.484±0.001    | 0.549±0.001 | 0.534±0.001  | 0.326±0.001    | 0.328±0.001  | 0.353±0.001  |
| <b>Impute5</b>                | 0.384±0.001    | 0.356±0.001 | 0.429±0.001  | 0.485±0.001    | 0.547±0.001 | 0.539±0.001  | 0.328±0.001    | 0.314±0.001  | 0.359±0.001  |

3 Validation accuracies were stratified by dataset (MESA, Welllderly, HGDP) and genotype array  
4 platform (Affymetrix 6.0, UKB Axiom, Omni 1.5M). We applied Wilcoxon rank-sum tests to compare  
5 the HMM-based tools to the reference tuned autoencoder (AE). \* represents p-values ≤ 0.05, \*\*  
6 indicates p-values ≤ 0.001, and \*\*\* indicates p-values ≤ 0.0001.

1 **Table S3.** Detailed performance comparisons between tuned autoencoder (AE) and HMM-based imputation tools (Minimac4, Beagle5, and  
2 Impute5).

| Dataset | Array          | MAF           | AE (tuned)<br>vs Minimac4 | AE (tuned)<br>vs Beagle5 | AE (tuned)<br>vs Impute5 | Minimac4 vs<br>Beagle5 | Minimac4<br>vs Impute5 | Beagle5 vs<br>Impute5 | AE (tuned)  | Minimac4    | Beagle5     | Impute5     |
|---------|----------------|---------------|---------------------------|--------------------------|--------------------------|------------------------|------------------------|-----------------------|-------------|-------------|-------------|-------------|
| MESA    | Affymetrix 6.0 | [0.001-0.005) | 3.84e-306***              | 0.00e+00***              | 0.00e+00***              | 0.00e+00***            | 1.30e-122***           | 0.00e+00***           | 0.141±0.001 | 0.128±0.001 | 0.129±0.001 | 0.121±0.001 |
| MESA    | Affymetrix 6.0 | [0.005-0.01)  | 1.37e-48***               | 3.39e-280***             | 8.96e-86***              | 3.12e-127***           | 1.13e-08***            | 1.22e-68***           | 0.280±0.001 | 0.266±0.001 | 0.258±0.001 | 0.262±0.001 |
| MESA    | Affymetrix 6.0 | [0.01-0.05)   | 2.62e-48***               | 6.14e-119***             | 3.54e-72***              | 4.61e-23***            | 8.85e-05***            | 7.81e-09***           | 0.490±0.001 | 0.467±0.001 | 0.453±0.001 | 0.461±0.001 |
| MESA    | Affymetrix 6.0 | [0.05-0.1)    | 2.11e-05***               | 4.44e-49***              | 2.36e-04**               | 3.26e-23***            | 7.11E-01               | 3.53e-24***           | 0.728±0.002 | 0.703±0.002 | 0.684±0.002 | 0.698±0.002 |
| MESA    | Affymetrix 6.0 | [0.1-0.2)     | 1.17e-15***               | 2.04e-50***              | 3.36e-09***              | 6.41e-11***            | 6.50E-02               | 8.64e-16***           | 0.793±0.002 | 0.763±0.002 | 0.753±0.002 | 0.758±0.002 |
| MESA    | Affymetrix 6.0 | [0.2-0.3)     | 1.02e-16***               | 5.61e-25***              | 6.87e-09***              | 5.09E-02               | 2.67e-02*              | 5.57e-05***           | 0.825±0.002 | 0.794±0.002 | 0.790±0.002 | 0.789±0.002 |
| MESA    | Affymetrix 6.0 | [0.3-0.4)     | 2.41e-19***               | 3.04e-28***              | 2.92e-09***              | 9.05E-02               | 1.08e-02*              | 3.17e-05***           | 0.834±0.002 | 0.799±0.002 | 0.798±0.002 | 0.795±0.002 |
| MESA    | Affymetrix 6.0 | [0.4-0.5)     | 2.46e-18***               | 7.67e-23***              | 3.85e-11***              | 3.80E-01               | 7.17E-02               | 9.77e-03*             | 0.842±0.002 | 0.806±0.002 | 0.805±0.003 | 0.801±0.003 |
| MESA    | UKB Axiom      | [0.001-0.005) | 0.00e+00***               | 0.00e+00***              | 0.00e+00***              | 0.00e+00***            | 1.04e-106***           | 1.10e-95***           | 0.145±0.001 | 0.117±0.001 | 0.132±0.001 | 0.108±0.001 |
| MESA    | UKB Axiom      | [0.005-0.01)  | 7.45e-142***              | 7.16e-191***             | 4.41e-242***             | 2.76e-23***            | 8.03e-18***            | 1.28E-01              | 0.255±0.001 | 0.226±0.001 | 0.249±0.001 | 0.216±0.001 |
| MESA    | UKB Axiom      | [0.01-0.05)   | 2.85e-128***              | 6.38e-41***              | 1.57e-181***             | 1.76e-12***            | 3.39e-07***            | 2.75e-34***           | 0.432±0.001 | 0.400±0.001 | 0.418±0.001 | 0.393±0.001 |
| MESA    | UKB Axiom      | [0.05-0.1)    | 5.91e-21***               | 4.88e-09***              | 2.14e-23***              | 2.68e-03*              | 4.80E-01               | 3.13e-04**            | 0.681±0.002 | 0.652±0.002 | 0.657±0.002 | 0.646±0.002 |
| MESA    | UKB Axiom      | [0.1-0.2)     | 1.12e-42***               | 2.66e-11***              | 5.58e-37***              | 9.55e-11***            | 5.04E-01               | 2.58e-08***           | 0.791±0.001 | 0.758±0.002 | 0.766±0.002 | 0.752±0.002 |
| MESA    | UKB Axiom      | [0.2-0.3)     | 8.25e-59***               | 1.62e-15***              | 5.06e-54***              | 2.23e-14***            | 8.15E-01               | 1.07e-12***           | 0.837±0.001 | 0.796±0.002 | 0.807±0.002 | 0.790±0.002 |
| MESA    | UKB Axiom      | [0.3-0.4)     | 8.13e-81***               | 7.00e-14***              | 3.82e-72***              | 3.98e-26***            | 8.34E-01               | 2.26e-22***           | 0.840±0.002 | 0.795±0.002 | 0.810±0.002 | 0.789±0.002 |
| MESA    | UKB Axiom      | [0.4-0.5)     | 5.60e-82***               | 8.03e-12***              | 1.69e-79***              | 6.34e-30***            | 6.20E-01               | 3.13e-29***           | 0.846±0.002 | 0.800±0.002 | 0.819±0.002 | 0.794±0.002 |

|                           |           |               |              |              |              |              |              |             |             |             |             |             |
|---------------------------|-----------|---------------|--------------|--------------|--------------|--------------|--------------|-------------|-------------|-------------|-------------|-------------|
| MESA                      | Omni 1.5M | [0.001-0.005) | 6.78e-179*** | 0.00e+00***  | 0.00e+00***  | 0.00e+00***  | 8.51e-66***  | 0.00e+00*** | 0.174±0.001 | 0.158±0.001 | 0.152±0.001 | 0.148±0.001 |
| MESA                      | Omni 1.5M | [0.005-0.01)  | 1.37e-23***  | 7.31e-253*** | 5.27e-53***  | 6.68e-147*** | 5.95e-08***  | 1.44e-90*** | 0.340±0.001 | 0.327±0.001 | 0.301±0.002 | 0.317±0.001 |
| MESA                      | Omni 1.5M | [0.01-0.05)   | 1.51e-05***  | 6.15e-118*** | 9.61e-14***  | 2.01e-77***  | 1.54e-03*    | 6.53e-53*** | 0.552±0.001 | 0.542±0.001 | 0.510±0.001 | 0.537±0.001 |
| MESA                      | Omni 1.5M | [0.05-0.1)    | 8.96E-01     | 2.53e-52***  | 1.91E-01     | 2.25e-48***  | 2.57E-01     | 2.05e-54*** | 0.759±0.002 | 0.750±0.002 | 0.723±0.002 | 0.749±0.002 |
| MESA                      | Omni 1.5M | [0.1-0.2)     | 7.72e-19***  | 3.14e-57***  | 5.03e-09***  | 5.40e-11***  | 6.88e-03*    | 2.65e-19*** | 0.828±0.001 | 0.806±0.002 | 0.797±0.002 | 0.805±0.002 |
| MESA                      | Omni 1.5M | [0.2-0.3)     | 2.53e-32***  | 2.68e-65***  | 6.69e-18***  | 8.66e-06***  | 6.61e-03*    | 6.35e-12*** | 0.866±0.002 | 0.838±0.002 | 0.834±0.002 | 0.838±0.002 |
| MESA                      | Omni 1.5M | [0.3-0.4)     | 4.87e-32***  | 3.52e-34***  | 5.66e-20***  | 8.88E-01     | 3.34e-02*    | 2.46e-02*   | 0.864±0.002 | 0.836±0.002 | 0.835±0.002 | 0.834±0.002 |
| MESA                      | Omni 1.5M | [0.4-0.5)     | 2.05e-53***  | 1.11e-22***  | 1.92e-38***  | 3.17e-08***  | 7.47E-02     | 4.31e-04**  | 0.879±0.002 | 0.847±0.002 | 0.854±0.002 | 0.845±0.002 |
| Welllderly Affymetrix 6.0 |           | [0.001-0.005) | 0.00e+00***  | 0.00e+00***  | 0.00e+00***  | 0.00e+00***  | 0.00e+00***  | 5.06e-19*** | 0.212±0.001 | 0.183±0.001 | 0.170±0.001 | 0.170±0.001 |
| Welllderly Affymetrix 6.0 |           | [0.005-0.01)  | 9.46e-58***  | 4.82e-140*** | 2.37e-167*** | 1.84e-26***  | 1.44e-39***  | 1.40e-02*   | 0.359±0.003 | 0.307±0.003 | 0.289±0.003 | 0.283±0.003 |
| Welllderly Affymetrix 6.0 |           | [0.01-0.05)   | 4.01e-43***  | 2.50e-149*** | 1.02e-88***  | 6.52e-34***  | 9.91e-12***  | 1.85e-06*** | 0.616±0.002 | 0.566±0.002 | 0.536±0.002 | 0.544±0.002 |
| Welllderly Affymetrix 6.0 |           | [0.05-0.1)    | 4.80e-19***  | 2.25e-55***  | 7.24e-16***  | 7.05e-12***  | 5.76E-01     | 7.95e-12*** | 0.820±0.002 | 0.783±0.003 | 0.761±0.003 | 0.769±0.003 |
| Welllderly Affymetrix 6.0 |           | [0.1-0.2)     | 1.08e-46***  | 4.14e-53***  | 3.92e-34***  | 2.40E-01     | 1.23E-01     | 1.03e-02*   | 0.869±0.002 | 0.830±0.002 | 0.821±0.002 | 0.820±0.002 |
| Welllderly Affymetrix 6.0 |           | [0.2-0.3)     | 7.27e-35***  | 4.70e-38***  | 1.12e-23***  | 5.90E-01     | 9.11E-02     | 2.47e-02*   | 0.889±0.002 | 0.856±0.002 | 0.850±0.002 | 0.848±0.002 |
| Welllderly Affymetrix 6.0 |           | [0.3-0.4)     | 1.93e-49***  | 3.99e-32***  | 1.43e-35***  | 7.35e-03*    | 1.17E-01     | 3.62E-01    | 0.888±0.002 | 0.851±0.002 | 0.848±0.003 | 0.844±0.002 |
| Welllderly Affymetrix 6.0 |           | [0.4-0.5)     | 8.77e-51***  | 7.23e-32***  | 5.15e-31***  | 3.34e-03*    | 1.11e-02*    | 8.04E-01    | 0.900±0.002 | 0.861±0.002 | 0.859±0.002 | 0.855±0.002 |
| Welllderly UKB Axiom      |           | [0.001-0.005) | 0.00e+00***  | 0.00e+00***  | 0.00e+00***  | 1.56e-98***  | 2.93e-173*** | 5.08e-13*** | 0.240±0.001 | 0.188±0.001 | 0.179±0.001 | 0.176±0.001 |
| Welllderly UKB Axiom      |           | [0.005-0.01)  | 1.42e-78***  | 3.64e-137*** | 4.44e-134*** | 8.25e-14***  | 2.51e-11***  | 3.79E-01    | 0.463±0.003 | 0.392±0.003 | 0.374±0.003 | 0.373±0.003 |
| Welllderly UKB Axiom      |           | [0.01-0.05)   | 3.20e-43***  | 4.20e-124*** | 1.06e-54***  | 5.93e-22***  | 3.75e-02*    | 1.29e-12*** | 0.761±0.002 | 0.714±0.002 | 0.694±0.002 | 0.701±0.002 |

|                      |               |              |              |              |              |              |             |             |             |             |             |
|----------------------|---------------|--------------|--------------|--------------|--------------|--------------|-------------|-------------|-------------|-------------|-------------|
| Welllderly UKB Axiom | [0.05-0.1)    | 1.63e-62***  | 1.70e-80***  | 1.47e-32***  | 6.88e-03*    | 7.27e-05***  | 1.74e-10*** | 0.911±0.001 | 0.879±0.002 | 0.868±0.002 | 0.875±0.002 |
| Welllderly UKB Axiom | [0.1-0.2)     | 1.21e-141*** | 4.36e-96***  | 4.21e-87***  | 1.88e-04**   | 2.59e-05***  | 5.92E-01    | 0.930±0.001 | 0.893±0.001 | 0.891±0.001 | 0.889±0.001 |
| Welllderly UKB Axiom | [0.2-0.3)     | 4.84e-219*** | 7.82e-121*** | 4.78e-154*** | 9.07e-15***  | 9.63e-04**   | 3.48e-05*** | 0.944±0.001 | 0.902±0.001 | 0.907±0.001 | 0.899±0.001 |
| Welllderly UKB Axiom | [0.3-0.4)     | 5.32e-257*** | 3.33e-135*** | 1.46e-196*** | 1.38e-21***  | 4.46e-02*    | 4.42e-12*** | 0.940±0.001 | 0.892±0.002 | 0.899±0.002 | 0.886±0.002 |
| Welllderly UKB Axiom | [0.4-0.5)     | 0.00e+00***  | 5.32e-156*** | 1.60e-244*** | 1.62e-34***  | 1.02e-02*    | 6.59e-19*** | 0.949±0.001 | 0.900±0.001 | 0.908±0.002 | 0.895±0.002 |
| Welllderly Omni 1.5M | [0.001-0.005) | 0.00e+00***  | 0.00e+00***  | 0.00e+00***  | 2.69e-183*** | 1.06e-207*** | 7.98e-03*   | 0.255±0.001 | 0.215±0.001 | 0.197±0.001 | 0.203±0.001 |
| Welllderly Omni 1.5M | [0.005-0.01)  | 1.20e-46***  | 1.49e-125*** | 1.09e-102*** | 8.69e-25***  | 4.07e-15***  | 1.55e-02*   | 0.428±0.003 | 0.376±0.003 | 0.347±0.003 | 0.355±0.003 |
| Welllderly Omni 1.5M | [0.01-0.05)   | 1.67e-13***  | 1.07e-93***  | 1.95e-25***  | 2.72e-36***  | 1.68e-03*    | 7.71e-19*** | 0.706±0.002 | 0.671±0.002 | 0.641±0.002 | 0.653±0.002 |
| Welllderly Omni 1.5M | [0.05-0.1)    | 5.40e-07***  | 6.60e-59***  | 8.37e-04**   | 1.59e-26***  | 1.12E-01     | 1.08e-31*** | 0.883±0.002 | 0.862±0.002 | 0.844±0.002 | 0.854±0.002 |
| Welllderly Omni 1.5M | [0.1-0.2)     | 2.89e-42***  | 1.73e-55***  | 1.08e-22***  | 4.85e-02*    | 1.70e-03*    | 1.76e-06*** | 0.915±0.002 | 0.889±0.002 | 0.885±0.002 | 0.883±0.002 |
| Welllderly Omni 1.5M | [0.2-0.3)     | 2.56e-68***  | 6.21e-68***  | 9.93e-47***  | 8.71E-01     | 3.06e-02*    | 6.20E-02    | 0.933±0.001 | 0.907±0.002 | 0.904±0.002 | 0.901±0.002 |
| Welllderly Omni 1.5M | [0.3-0.4)     | 3.99e-89***  | 1.54e-58***  | 3.55e-68***  | 1.15e-04**   | 1.52E-01     | 3.57e-02*   | 0.927±0.002 | 0.896±0.002 | 0.897±0.002 | 0.892±0.002 |
| Welllderly Omni 1.5M | [0.4-0.5)     | 1.88e-101*** | 5.27e-60***  | 2.12e-68***  | 6.34e-07***  | 1.44e-02*    | 2.86e-02*   | 0.933±0.002 | 0.902±0.002 | 0.904±0.002 | 0.897±0.002 |
| HGDP Affymetrix 6.0  | [0.001-0.005) | 0.00e+00***  | 0.00e+00***  | 0.00e+00***  | 0.00e+00***  | 0.00e+00***  | 4.57e-76*** | 0.115±0.000 | 0.110±0.001 | 0.094±0.000 | 0.097±0.000 |
| HGDP Affymetrix 6.0  | [0.005-0.01)  | 9.42e-37***  | 0.00e+00***  | 1.41e-180*** | 1.23e-172*** | 2.29e-59***  | 6.90e-31*** | 0.255±0.001 | 0.245±0.001 | 0.212±0.001 | 0.224±0.001 |
| HGDP Affymetrix 6.0  | [0.01-0.05)   | 1.27e-19***  | 5.35e-251*** | 5.51e-161*** | 3.40e-124*** | 1.46e-68***  | 3.88e-09*** | 0.477±0.001 | 0.461±0.001 | 0.416±0.001 | 0.428±0.001 |
| HGDP Affymetrix 6.0  | [0.05-0.1)    | 5.84e-07***  | 1.05e-90***  | 3.49e-67***  | 5.86e-46***  | 3.24e-32***  | 4.07e-02*   | 0.720±0.002 | 0.695±0.002 | 0.662±0.002 | 0.660±0.002 |
| HGDP Affymetrix 6.0  | [0.1-0.2)     | 4.01e-09***  | 6.45e-78***  | 6.97e-76***  | 1.44e-32***  | 1.49e-33***  | 4.55E-01    | 0.791±0.002 | 0.765±0.002 | 0.747±0.002 | 0.733±0.002 |
| HGDP Affymetrix 6.0  | [0.2-0.3)     | 2.52e-13***  | 1.54e-56***  | 2.43e-64***  | 9.52e-15***  | 2.08e-20***  | 6.08E-02    | 0.813±0.002 | 0.786±0.002 | 0.774±0.002 | 0.760±0.002 |

|      |                |               |              |              |              |              |              |              |             |             |             |             |
|------|----------------|---------------|--------------|--------------|--------------|--------------|--------------|--------------|-------------|-------------|-------------|-------------|
| HGDP | Affymetrix 6.0 | [0.3-0.4)     | 5.85e-16***  | 6.47e-64***  | 7.68e-72***  | 2.25e-15***  | 9.49e-21***  | 7.35E-02     | 0.835±0.002 | 0.806±0.002 | 0.793±0.002 | 0.782±0.002 |
| HGDP | Affymetrix 6.0 | [0.4-0.5)     | 2.89e-16***  | 7.59e-40***  | 9.69e-63***  | 7.01e-06***  | 3.98e-16***  | 7.45e-05***  | 0.836±0.002 | 0.805±0.002 | 0.797±0.002 | 0.781±0.002 |
| HGDP | UKB Axiom      | [0.001-0.005) | 0.00e+00***  | 0.00e+00***  | 0.00e+00***  | 0.00e+00***  | 0.00e+00***  | 1.59e-03*    | 0.109±0.000 | 0.096±0.000 | 0.086±0.000 | 0.080±0.000 |
| HGDP | UKB Axiom      | [0.005-0.01)  | 6.42e-154*** | 0.00e+00***  | 0.00e+00***  | 1.60e-75***  | 4.56e-76***  | 5.59E-01     | 0.233±0.001 | 0.206±0.001 | 0.193±0.001 | 0.180±0.001 |
| HGDP | UKB Axiom      | [0.01-0.05)   | 1.58e-100*** | 7.46e-277*** | 0.00e+00***  | 7.30e-49***  | 2.07e-107*** | 1.88e-12***  | 0.455±0.001 | 0.421±0.001 | 0.396±0.001 | 0.382±0.001 |
| HGDP | UKB Axiom      | [0.05-0.1)    | 9.25e-18***  | 8.34e-48***  | 3.52e-139*** | 2.05e-08***  | 9.53e-57***  | 2.15e-24***  | 0.746±0.002 | 0.718±0.002 | 0.704±0.002 | 0.678±0.002 |
| HGDP | UKB Axiom      | [0.1-0.2)     | 1.69e-51***  | 1.48e-73***  | 1.93e-253*** | 3.65e-03*    | 9.55e-77***  | 3.82e-55***  | 0.817±0.001 | 0.785±0.001 | 0.779±0.001 | 0.748±0.002 |
| HGDP | UKB Axiom      | [0.2-0.3)     | 2.31e-71***  | 5.99e-63***  | 4.54e-249*** | 3.50E-01     | 2.43e-55***  | 2.29e-60***  | 0.844±0.001 | 0.808±0.002 | 0.805±0.002 | 0.773±0.002 |
| HGDP | UKB Axiom      | [0.3-0.4)     | 1.63e-104*** | 4.84e-81***  | 3.67e-302*** | 9.67e-03*    | 2.63e-52***  | 3.67e-70***  | 0.860±0.001 | 0.819±0.002 | 0.818±0.002 | 0.788±0.002 |
| HGDP | UKB Axiom      | [0.4-0.5)     | 3.74e-93***  | 5.24e-50***  | 8.92e-262*** | 5.86e-08***  | 2.88e-45***  | 3.80e-83***  | 0.861±0.001 | 0.821±0.002 | 0.827±0.002 | 0.791±0.002 |
| HGDP | Omni 1.5M      | [0.001-0.005) | 5.46e-226*** | 0.00e+00***  | 0.00e+00***  | 0.00e+00***  | 3.78e-302*** | 1.17e-153*** | 0.139±0.001 | 0.135±0.001 | 0.112±0.001 | 0.117±0.001 |
| HGDP | Omni 1.5M      | [0.005-0.01)  | 1.04e-09***  | 0.00e+00***  | 2.39e-110*** | 2.55e-221*** | 2.71e-56***  | 1.73e-59***  | 0.292±0.001 | 0.290±0.001 | 0.240±0.001 | 0.261±0.001 |
| HGDP | Omni 1.5M      | [0.01-0.05)   | 4.61E-01     | 7.26e-252*** | 8.61e-99***  | 1.15e-221*** | 3.08e-85***  | 2.14e-34***  | 0.513±0.001 | 0.510±0.001 | 0.451±0.001 | 0.474±0.001 |
| HGDP | Omni 1.5M      | [0.05-0.1)    | 1.58E-01     | 5.99e-77***  | 2.18e-41***  | 5.10e-79***  | 2.87e-45***  | 2.85e-05***  | 0.772±0.002 | 0.764±0.002 | 0.730±0.002 | 0.730±0.002 |
| HGDP | Omni 1.5M      | [0.1-0.2)     | 1.63e-08***  | 3.95e-95***  | 7.52e-111*** | 1.44e-43***  | 6.73e-57***  | 5.16e-03*    | 0.822±0.001 | 0.805±0.002 | 0.787±0.002 | 0.774±0.002 |
| HGDP | Omni 1.5M      | [0.2-0.3)     | 2.18e-14***  | 5.45e-80***  | 1.70e-107*** | 2.92e-25***  | 5.09e-43***  | 7.27e-05***  | 0.851±0.002 | 0.832±0.002 | 0.819±0.002 | 0.805±0.002 |
| HGDP | Omni 1.5M      | [0.3-0.4)     | 1.09e-34***  | 1.27e-114*** | 5.18e-157*** | 7.10e-21***  | 4.34e-44***  | 4.80e-07***  | 0.873±0.001 | 0.848±0.002 | 0.836±0.002 | 0.821±0.002 |
| HGDP | Omni 1.5M      | [0.4-0.5)     | 2.78e-29***  | 8.21e-50***  | 4.50e-131*** | 1.90e-03*    | 2.67e-37***  | 1.11e-23***  | 0.867±0.002 | 0.843±0.002 | 0.837±0.002 | 0.817±0.002 |

- 1 Validation accuracies were stratified by dataset (MESA, Welllderly, HGGP), genotype array platform (Affymetrix 6.0, UKB Axiom, Omni 1.5M), and
- 2 MAF bin. We applied Wilcoxon rank-sum tests to compare the HMM-based tools to the reference tuned autoencoder (AE). \* represents p-values  $\leq$
- 3 0.05, \*\* indicates p-values  $\leq 0.001$ , and \*\*\* indicates p-values  $\leq 0.0001$ .
